# Supplementary material for: Effects of Weight Loss and Moderate-Protein, High-Fiber Diet Consumption on the Fasted Serum Metabolome of Cats
Source: MDPI journal article supplement (doi:10.3390/metabo11050324), 2021-05-18
Supplement: s1 [file s1]

# Supplementary tables

**Table S1.** Serum metabolites related to lipid metabolism that were altered in cats undergoing weight loss<sup>a,b</sup>

| Metabolic Pathway                      | Metabolite                                         | Fold change |      |      |      |       |       |
|----------------------------------------|----------------------------------------------------|-------------|------|------|------|-------|-------|
|                                        |                                                    | wk 1        | wk 2 | wk 4 | wk 8 | wk 12 | wk 16 |
|                                        |                                                    | wk 0        | wk 0 | wk 0 | wk 0 | wk 0  | wk 0  |
| Lipids                                 |                                                    |             |      |      |      |       |       |
| Medium Chain Fatty Acid                | heptanoate (7:0)                                   | 0.89        | 0.86 | 0.94 | 0.9  | 0.85  | 0.84  |
|                                        | pelargonate (9:0)                                  | 0.83        | 0.75 | 0.84 | 0.72 | 0.67  | 1.26  |
|                                        | caprate (10:0)                                     | 0.91        | 0.88 | 0.92 | 0.88 | 0.79  | 0.96  |
|                                        | undecanoate (11:0)                                 | 0.86        | 0.83 | 0.86 | 0.94 | 0.73  | 0.99  |
|                                        | 10-undecenoate (11:1n1)                            | 1.11        | 1.21 | 1.4  | 1.52 | 1.48  | 1.6   |
|                                        | laurate (12:0)                                     | 0.95        | 0.85 | 0.88 | 0.89 | 0.73  | 0.74  |
| Long Chain Fatty Acid                  | pentadecanoate (15:0)                              | 0.93        | 0.9  | 0.85 | 0.8  | 0.8   | 0.81  |
|                                        | palmitate (16:0)                                   | 1           | 0.99 | 0.96 | 0.87 | 0.87  | 0.9   |
|                                        | palmitoleate (16:1n7)                              | 0.98        | 0.94 | 0.9  | 0.88 | 0.86  | 0.82  |
|                                        | margarate (17:0)                                   | 0.97        | 0.98 | 0.88 | 0.76 | 0.81  | 0.77  |
|                                        | 10-heptadecenoate (17:1n7)                         | 0.99        | 0.92 | 0.85 | 0.81 | 0.82  | 0.74  |
|                                        | stearate (18:0)                                    | 1.02        | 1.03 | 0.96 | 0.85 | 0.88  | 0.87  |
|                                        | oleate (18:1n9)                                    | 0.88        | 0.95 | 0.86 | 0.8  | 0.89  | 0.82  |
|                                        | cis-vaccenate (18:1n7)                             | 0.93        | 1.06 | 0.89 | 0.85 | 0.91  | 0.86  |
|                                        | arachidate (20:0)                                  | 1.04        | 1.06 | 0.97 | 0.82 | 0.86  | 0.86  |
| Polyunsaturated Fatty Acid (n3 and n6) | stearidonate (18:4n3)                              | 0.91        | 0.87 | 0.81 | 0.66 | 0.55  | 0.49  |
|                                        | eicosapentaenoate (EPA; 20:5n3)                    | 0.95        | 0.94 | 0.86 | 0.7  | 0.65  | 0.74  |
|                                        | docosahexaenoate (DHA; 22:6n3)                     | 1.15        | 1.16 | 1.14 | 1.08 | 0.94  | 0.98  |
|                                        | linoleate (18:2n6)                                 | 0.96        | 0.96 | 0.88 | 0.83 | 0.82  | 0.85  |
|                                        | linolenate (18:3n3 or 6)                           | 0.88        | 0.88 | 0.79 | 0.71 | 0.69  | 0.64  |
|                                        | dihomo-linolenate (20:3n3 or n6)                   | 1           | 0.97 | 0.93 | 0.83 | 0.75  | 0.74  |
|                                        | arachidonate (20:4n6)                              | 1.03        | 1.13 | 1.13 | 1.01 | 0.84  | 0.81  |
|                                        | docosapentaenoate (n6 DPA; 22:5n6)                 | 1.28        | 1.3  | 1.29 | 1.25 | 1.13  | 1.05  |
| Fatty Acid, Branched                   | 15-methylpalmitate (isobar with 2-methylpalmitate) | 0.99        | 1.02 | 0.88 | 0.81 | 0.84  | 0.64  |
|                                        | pristanate                                         | 0.96        | 0.88 | 0.97 | 0.88 | 0.8   | 0.68  |
| Fatty Acid, Dicarboxylate              | adipate                                            | 0.77        | 0.71 | 0.8  | 0.67 | 0.71  | 0.74  |
|                                        | 2-hydroxyadipate                                   | 0.79        | 0.7  | 0.65 | 0.6  | 0.57  | 0.71  |
|                                        | maleate (cis-Butenedioate)                         | 0.93        | 0.93 | 0.83 | 0.78 | 0.92  | 0.85  |
|                                        | pimelate (heptanedioate)                           | 0.82        | 0.73 | 0.76 | 0.66 | 0.63  | 0.83  |
|                                        | suberate (octanedioate)                            | 0.81        | 0.7  | 0.77 | 0.65 | 0.6   | 0.79  |
|                                        | azelate (nonanedioate)                             | 0.81        | 0.7  | 0.78 | 0.65 | 0.6   | 0.84  |
|                                        | sebacate (decanedioate)                            | 0.82        | 0.73 | 0.79 | 0.65 | 0.62  | 0.76  |
|                                        | undecanedioate                                     | 0.83        | 0.73 | 0.79 | 0.68 | 0.65  | 0.83  |
|                                        | 1,11-undecanedicarboxylate                         | 0.77        | 0.69 | 0.75 | 0.68 | 0.66  | 0.91  |
|                                        | dodecanedioate                                     | 0.84        | 0.75 | 0.78 | 0.69 | 0.67  | 0.84  |
|                                        | tetradecanedioate                                  | 0.9         | 0.81 | 0.83 | 0.8  | 0.75  | 0.84  |
|                                        | hexadecanedioate                                   | 0.77        | 0.69 | 0.72 | 0.7  | 0.69  | 0.74  |
|                                        | octadecanedioate                                   | 0.9         | 0.9  | 0.98 | 0.91 | 0.98  | 0.97  |

**Table S1 (cont.)**

|                                              |                                                      |             |             |             |             |             |             |
|----------------------------------------------|------------------------------------------------------|-------------|-------------|-------------|-------------|-------------|-------------|
|                                              | eicosanodioate                                       | 1.02        | 1.03        | 1.12        | 1.09        | <b>1.16</b> | 1.09        |
|                                              | docosadioate                                         | 0.84        | <b>0.81</b> | <b>0.83</b> | <b>0.7</b>  | <b>0.76</b> | <b>0.72</b> |
|                                              | 3-carboxy-4-methyl-5-propyl-2-furanpropanoate (CMPF) | <b>0.82</b> | <b>0.81</b> | <b>0.72</b> | <b>0.56</b> | <b>0.63</b> | <b>0.82</b> |
| Fatty Acid, Amino                            | 2-aminoheptanoate                                    | 0.96        | 1.05        | 1.09        | 1.14        | 1.13        | <b>1.26</b> |
|                                              | 2-aminooctanoate                                     | <b>1.16</b> | 1.12        | <b>1.21</b> | 1.07        | 0.95        | <b>0.82</b> |
| Fatty Acid Synthesis                         | malonylcarnitine                                     | 1.21        | <b>1.35</b> | <b>1.57</b> | <b>1.77</b> | <b>1.84</b> | <b>1.58</b> |
|                                              | malonate (propanedioate)                             | <b>1.36</b> | <b>1.44</b> | <b>1.38</b> | <b>1.3</b>  | <b>1.37</b> | <b>1.36</b> |
|                                              | 2-methylmalonyl carnitine                            | 1.22        | 1.4         | <b>1.68</b> | <b>1.96</b> | <b>2.14</b> | <b>1.86</b> |
| Fatty Acid Metabolism (also BCAA Metabolism) | butyrylcarnitine                                     | 0.85        | <b>0.78</b> | <b>0.8</b>  | <b>0.81</b> | <b>0.8</b>  | <b>0.69</b> |
|                                              | propionylcarnitine                                   | <b>0.65</b> | <b>0.63</b> | <b>0.59</b> | <b>0.67</b> | <b>0.63</b> | <b>0.62</b> |
|                                              | propionylglycine                                     | 0.82        | 0.85        | 0.84        | 0.74        | <b>0.65</b> | <b>1.61</b> |
| FA Metabolism (Acyl Glycine)                 | hexanoylglycine                                      | <b>1.55</b> | <b>1.56</b> | <b>1.98</b> | <b>2.22</b> | <b>2.33</b> | <b>2.11</b> |
|                                              | N-octanoylglycine                                    | 1.22        | 1.3         | 1.55        | <b>3.04</b> | <b>2.78</b> | 1.7         |
| FA Metabolism (Acyl Carnitine)               | hydroxybutyrylcarnitine*                             | 0.94        | 1.13        | 1.32        | <b>1.85</b> | <b>2</b>    | 1.63        |
| Ketone Bodies                                | acetoacetate                                         | <b>1.54</b> | <b>1.59</b> | <b>1.93</b> | <b>1.91</b> | <b>1.54</b> | 1.08        |
|                                              | 3-hydroxybutyrate (BHBA)                             | 1.51        | <b>1.72</b> | <b>1.95</b> | <b>2.09</b> | <b>2</b>    | <b>1.74</b> |
| Fatty Acid, Monohydroxy                      | 2-hydroxyoctanoate                                   | <b>0.81</b> | <b>0.79</b> | <b>0.87</b> | <b>0.71</b> | <b>0.55</b> | <b>0.48</b> |
|                                              | 2-hydroxydecanoate                                   | <b>0.86</b> | <b>0.77</b> | <b>0.86</b> | <b>0.67</b> | <b>0.47</b> | <b>0.41</b> |
|                                              | 3-hydroxyoctanoate                                   | 1.02        | 1.06        | 1.27        | 1.31        | <b>1.36</b> | 1.32        |
|                                              | 3-hydroxydecanoate                                   | 0.86        | <b>0.81</b> | 0.94        | 0.86        | <b>0.83</b> | <b>0.86</b> |
|                                              | 3-hydroxysebacate                                    | <b>0.58</b> | <b>0.6</b>  | <b>0.49</b> | <b>0.46</b> | <b>0.47</b> | <b>0.64</b> |
|                                              | 3-hydroxylaurate                                     | <b>0.74</b> | <b>0.71</b> | <b>0.75</b> | <b>0.64</b> | <b>0.64</b> | <b>0.64</b> |
|                                              | 3-hydroxymyristate                                   | 0.86        | 0.82        | 0.85        | <b>0.69</b> | <b>0.77</b> | <b>0.7</b>  |
|                                              | 5-hydroxyhexanoate                                   | 0.94        | <b>0.82</b> | <b>0.78</b> | <b>0.71</b> | <b>0.64</b> | <b>0.83</b> |
|                                              | 5-hydroxydecanoate                                   | 0.84        | <b>0.69</b> | <b>0.76</b> | <b>0.67</b> | <b>0.58</b> | <b>0.78</b> |
|                                              | 8-hydroxyoctanoate                                   | 0.8         | <b>0.78</b> | 0.83        | <b>0.7</b>  | <b>0.67</b> | 0.81        |
|                                              | 16-hydroxypalmitate                                  | 0.9         | <b>0.78</b> | <b>0.81</b> | <b>0.8</b>  | <b>0.73</b> | <b>0.69</b> |
|                                              | 13-HODE + 9-HODE                                     | 0.81        | 0.78        | <b>0.62</b> | <b>0.59</b> | <b>0.47</b> | <b>0.35</b> |
| Fatty Acid, Dihydroxy                        | 12,13-DiHOME                                         | <b>0.74</b> | <b>0.62</b> | <b>0.6</b>  | <b>0.44</b> | <b>0.3</b>  | <b>0.24</b> |
|                                              | 9,10-DiHOME                                          | 0.86        | 0.74        | 0.73        | <b>0.48</b> | <b>0.42</b> | <b>0.38</b> |
| Eicosanoid                                   | thromboxane B2                                       | 0.68        | 1.23        | 0.81        | 0.82        | 0.48        | <b>0.31</b> |
|                                              | 12-HETE                                              | <b>0.56</b> | 0.82        | <b>0.61</b> | <b>0.54</b> | <b>0.4</b>  | <b>0.25</b> |
| Endocannabinoid                              | oleic ethanolamide                                   | 1.18        | <b>1.31</b> | 1.19        | 1.05        | 1.01        | 1.03        |
|                                              | palmitoyl ethanolamide                               | 1.17        | 1.21        | 1.23        | <b>1.22</b> | 1.15        | <b>1.28</b> |
|                                              | N-stearoyltaurine                                    | 1.11        | 1.05        | 0.99        | 0.91        | <b>0.77</b> | <b>0.7</b>  |
|                                              | N-palmitoyltaurine                                   | 1.02        | 0.96        | 0.96        | <b>0.82</b> | <b>0.75</b> | <b>0.76</b> |
|                                              | N-linolenoyltaurine *                                | 0.8         | 1.2         | 0.99        | 0.77        | 0.82        | <b>0.58</b> |
| Inositol Metabolism                          | myo-inositol                                         | <b>0.66</b> | <b>0.66</b> | <b>0.76</b> | <b>0.77</b> | <b>0.81</b> | <b>0.74</b> |
|                                              | scyllo-inositol                                      | <b>0.6</b>  | <b>0.59</b> | <b>0.7</b>  | <b>0.79</b> | <b>0.78</b> | <b>0.65</b> |
|                                              | inositol 1-phosphate (I1P)                           | <b>0.73</b> | <b>0.82</b> | <b>0.71</b> | <b>0.75</b> | <b>0.68</b> | <b>0.58</b> |

Table S1 (cont.)

|                         |                                              |             |             |             |             |             |             |
|-------------------------|----------------------------------------------|-------------|-------------|-------------|-------------|-------------|-------------|
| Phospholipid Metabolism | choline                                      | 0.73        | 0.69        | 0.71        | 0.69        | 0.7         | <b>0.59</b> |
|                         | choline phosphate                            | <b>0.63</b> | <b>0.64</b> | <b>0.63</b> | <b>0.64</b> | <b>0.59</b> | <b>0.53</b> |
|                         | glycerophosphorylcholine (GPC)               | <b>0.72</b> | <b>0.73</b> | <b>0.64</b> | <b>0.62</b> | <b>0.66</b> | <b>0.7</b>  |
|                         | phosphoethanolamine                          | <b>0.51</b> | <b>0.54</b> | <b>0.64</b> | <b>0.64</b> | <b>0.61</b> | <b>0.51</b> |
|                         | glycerophosphoethanolamine                   | <b>0.67</b> | <b>0.64</b> | <b>0.57</b> | <b>0.59</b> | <b>0.65</b> | <b>0.59</b> |
| Lysolipid               | 1-palmitoylglycerophosphocholine             | 1.19        | 0.7         | 0.68        | 0.99        | 0.89        | <b>0.38</b> |
|                         | 1-palmitoleoylglycerophosphocholine          | 1.46        | 0.75        | 0.7         | 1.57        | 1           | <b>0.35</b> |
|                         | 2-palmitoleoylglycerophosphocholine          | 0.83        | <b>0.78</b> | <b>0.61</b> | <b>0.61</b> | <b>0.38</b> | <b>0.54</b> |
|                         | 1-stearoylglycerophosphocholine              | 1.01        | 0.55        | 0.56        | 0.91        | 0.75        | <b>0.32</b> |
|                         | 2-stearoylglycerophosphocholine              | 1.42        | 0.62        | 0.53        | 1.11        | 0.59        | <b>0.3</b>  |
|                         | 1-oleoylglycerophosphocholine                | 1.18        | 0.66        | 0.55        | 0.97        | 0.72        | <b>0.31</b> |
|                         | 1-linoleoylglycerophosphocholine             | 1.16        | 0.73        | 0.62        | 0.98        | 0.82        | <b>0.35</b> |
|                         | 1-linolenoylglycerophosphocholine            | 1.18        | 0.6         | 0.47        | 0.78        | 0.58        | <b>0.17</b> |
|                         | 1-palmitoylplasmenylethanolamine             | 0.66        | 0.72        | <b>0.65</b> | <b>0.67</b> | <b>0.54</b> | <b>0.5</b>  |
|                         | 1-stearoylplasmenylethanolamine              | 0.85        | 1.3         | 1.26        | 0.96        | 0.98        | <b>0.56</b> |
|                         | 1-oleoylplasmenylethanolamine                | 0.57        | 0.74        | <b>0.62</b> | <b>0.52</b> | <b>0.35</b> | <b>0.32</b> |
|                         | 1-oleoylglycerophosphoethanolamine           | <b>0.74</b> | <b>0.65</b> | <b>0.53</b> | <b>0.47</b> | <b>0.54</b> | <b>0.6</b>  |
|                         | 1-linoleoylglycerophosphoethanolamine        | 0.78        | 0.75        | <b>0.65</b> | <b>0.6</b>  | <b>0.7</b>  | <b>0.7</b>  |
|                         | 1-arachidonoylglycerophosphoethanolamine     | 0.86        | 0.82        | 0.75        | <b>0.69</b> | <b>0.76</b> | <b>0.73</b> |
|                         | 1-palmitoylglycerophosphoinositol            | 1.56        | <b>1.73</b> | 1.37        | 1.07        | <b>0.32</b> | 0.82        |
|                         | 1-stearoylglycerophosphoinositol             | 1.1         | 1.19        | 1.05        | 0.73        | <b>0.6</b>  | <b>0.6</b>  |
|                         | 1-oleoylglycerophosphoinositol               | 0.93        | 1.24        | 1.05        | <b>0.3</b>  | <b>0.31</b> | <b>0.26</b> |
|                         | 1-linoleoylglycerophosphoinositol            | 1.13        | 1.17        | 0.88        | <b>0.65</b> | <b>0.65</b> | <b>0.72</b> |
|                         | 1-arachidonoylglycerophosphoinositol         | <b>1.29</b> | <b>1.4</b>  | 1.12        | 0.95        | 0.83        | 0.98        |
|                         | 1-linoleoylglycerophosphoserine              | 0.76        | 0.8         | <b>0.28</b> | <b>0.22</b> | <b>0.23</b> | <b>0.12</b> |
|                         | 1-arachidonoylglycerophosphate               | 1.11        | 0.84        | <b>0.41</b> | <b>0.61</b> | <b>0.36</b> | <b>0.37</b> |
|                         | oleoyl-linoleoyl-glycerophosphoinositol      | 0.83        | <b>0.84</b> | <b>0.8</b>  | <b>0.58</b> | <b>0.59</b> | <b>0.56</b> |
|                         | palmitoyl-arachidonoyl-glycerophosphocholine | 1.3         | 1.33        | 1.06        | 1.17        | 1.08        | <b>1.36</b> |
|                         | palmitoyl-linoleoyl-glycerophosphoinositol   | 0.82        | 0.88        | 0.84        | <b>0.63</b> | <b>0.59</b> | <b>0.58</b> |
|                         | stearoyl-arachidonoyl-glycerophosphocholine  | 1.01        | <b>1.14</b> | <b>1.15</b> | 1.04        | 0.96        | <b>0.89</b> |
|                         | stearoyl-arachidonoyl-glycerophosphoinositol | 0.98        | 0.96        | 1           | 0.85        | <b>0.78</b> | <b>0.75</b> |
|                         | stearoyl-linoleoyl-glycerophosphocholine     | 0.97        | 0.95        | 0.85        | <b>0.8</b>  | <b>0.81</b> | 0.94        |
|                         | stearoyl-arachidonoyl-glycerophosphoinositol | 1.79        | 1.14        | 1.47        | <b>2.03</b> | 1.76        | <b>2.78</b> |
| Glycerolipid Metabolism | glycerol                                     | 0.9         | <b>0.78</b> | 1           | 1.08        | 1           | 0.99        |
|                         | glycerol 3-phosphate (G3P)                   | <b>0.59</b> | <b>0.52</b> | 0.7         | <b>0.67</b> | 0.77        | <b>0.68</b> |
|                         | glycerophosphoglycerol                       | <b>0.72</b> | <b>0.62</b> | <b>0.6</b>  | <b>0.61</b> | <b>0.6</b>  | <b>0.6</b>  |

**Table S1 (cont.)**

|                                |                                                  |             |             |             |             |             |             |
|--------------------------------|--------------------------------------------------|-------------|-------------|-------------|-------------|-------------|-------------|
| Monoacylglycerol               | 1-palmitoylglycerol (1-monopalmitin)             | <b>1.41</b> | <b>1.5</b>  | <b>1.69</b> | <b>1.85</b> | <b>1.68</b> | <b>1.74</b> |
|                                | 2-palmitoylglycerol (2-monopalmitin)             | <b>3.05</b> | 1.81        | <b>2.18</b> | <b>2.74</b> | <b>2.59</b> | <b>1.92</b> |
|                                | 1-stearoylglycerol (1-monostearin)               | 0.99        | 1.07        | 1.19        | 1.1         | <b>1.22</b> | 1.06        |
|                                | 1-linoleoylglycerol (1-monolinolein)             | <b>1.37</b> | <b>1.65</b> | <b>1.81</b> | <b>1.59</b> | <b>1.45</b> | <b>1.65</b> |
|                                | 2-linoleoylglycerol (2-monolinolein)             | 1.48        | 1.76        | <b>2.86</b> | <b>2.17</b> | 1.47        | 2.05        |
|                                | 1-arachidonylglycerol                            | <b>1.79</b> | <b>2.35</b> | <b>2.73</b> | <b>2.45</b> | <b>2.18</b> | <b>2.41</b> |
|                                | 2-arachidonoyl glycerol                          | 1.48        | 2.91        | <b>3.07</b> | <b>2.61</b> | 2.33        | 2.19        |
|                                | 1-docosahexaenoylglycerol                        | <b>1.52</b> | <b>2.31</b> | <b>2.53</b> | <b>2.15</b> | <b>1.76</b> | <b>2.26</b> |
| Sphingolipid Metabolism        | 2-docosahexaenoylglycerol*                       | 1.71        | 1.67        | <b>2.71</b> | 1.87        | 1.32        | 1.34        |
|                                | stearoyl sphingomyelin                           | 1.07        | 1.09        | 1.19        | <b>1.35</b> | <b>1.24</b> | <b>1.37</b> |
|                                | oleoyl sphingomyelin                             | 1.11        | 1.13        | <b>1.33</b> | <b>1.32</b> | <b>1.24</b> | <b>1.35</b> |
|                                | sphingosine                                      | 0.53        | <b>0.41</b> | <b>0.34</b> | <b>0.23</b> | <b>0.36</b> | <b>0.16</b> |
|                                | palmitoleoyl sphingomyelin*                      | 0.99        | 1.07        | <b>1.19</b> | 1.07        | 1.11        | 1.12        |
|                                | erucoyl sphingomyelin*                           | 1.17        | 1.17        | 1.57        | 1.52        | 1.35        | <b>1.96</b> |
| Mevalonate Metabolism          | arachidoyl sphingomyelin*                        | 2.21        | 0.9         | 2           | 1.81        | <b>2.56</b> | <b>2.09</b> |
|                                | mevalonate                                       | 1.11        | 0.95        | 0.84        | <b>0.68</b> | <b>0.65</b> | <b>0.59</b> |
| Sterol                         | cholesterol                                      | 0.96        | 0.99        | 0.95        | 0.94        | <b>0.93</b> | 0.95        |
|                                | 7-alpha-hydroxy-3-oxo-4-cholestenoate (7-Hoca)   | 0.97        | 1           | 1.09        | <b>1.1</b>  | 1.07        | 1.04        |
|                                | cholestanol                                      | 0.9         | 0.91        | 0.87        | 0.86        | <b>0.79</b> | <b>0.81</b> |
|                                | beta-sitosterol                                  | 0.88        | 0.94        | 0.8         | <b>0.74</b> | <b>0.79</b> | <b>0.79</b> |
|                                | campesterol                                      | 0.85        | 0.89        | <b>0.81</b> | <b>0.8</b>  | <b>0.77</b> | <b>0.8</b>  |
|                                | fucosterol                                       | 0.94        | 0.91        | 0.81        | <b>0.65</b> | <b>0.72</b> | <b>0.61</b> |
| Steroid                        | 5alpha-pregnan-3beta,20beta-diol monosulfate (1) | 1.18        | 1.11        | 1.18        | <b>1.21</b> | 1.12        | 1.05        |
|                                | cortisol                                         | <b>0.38</b> | <b>0.33</b> | <b>0.44</b> | 0.84        | 0.67        | 0.69        |
|                                | cortisone                                        | <b>0.6</b>  | <b>0.48</b> | 0.73        | 0.93        | 0.94        | 0.89        |
| Primary Bile Acid Metabolism   | cholate                                          | <b>0.03</b> | <b>0.01</b> | <b>0.01</b> | <b>0</b>    | <b>0.01</b> | <b>0.01</b> |
|                                | taurocholate                                     | <b>0.14</b> | <b>0.19</b> | <b>0.17</b> | <b>0.19</b> | <b>0.19</b> | <b>0.19</b> |
| Secondary Bile Acid Metabolism | deoxycholate                                     | <b>0.38</b> | <b>0.41</b> | <b>0.35</b> | <b>0.26</b> | <b>0.32</b> | <b>0.29</b> |
|                                | tauroolithocholate 3-sulfate                     | 0.97        | <b>0.83</b> | 0.88        | 0.91        | 0.94        | 0.91        |
|                                | ursodeoxycholate                                 | 0.55        | 0.6         | <b>0.51</b> | <b>0.24</b> | <b>0.31</b> | <b>0.36</b> |

<sup>a</sup>For each metabolite, mean value is the group mean of re-scaled data to have median equal to 1.

<sup>b</sup>Mean values in green were decreased, whereas in red were increased with *P*- and *q*- values < 0.05. *P* values were calculated from one way Anova; *q*- values were used to estimate the false discovery rate (FDR) in multiple comparisons.

**Table S2.** Serum metabolites related to amino acid and peptide metabolism that were altered in cats undergoing weight loss<sup>a,b</sup>

| Metabolic Pathway                        | Metabolite                           | Fold change |      |      |      |       |       |
|------------------------------------------|--------------------------------------|-------------|------|------|------|-------|-------|
|                                          |                                      | wk 1        | wk 2 | wk 4 | wk 8 | wk 12 | wk 16 |
|                                          |                                      | wk 0        | wk 0 | wk 0 | wk 0 | wk 0  | wk 0  |
| <i>Amino Acids</i>                       |                                      |             |      |      |      |       |       |
| Glycine, Serine and Threonine Metabolism | glycine                              | 1.1         | 1.09 | 1.18 | 1.22 | 1.25  | 1.08  |
|                                          | N-acetyl glycine                     | 1.37        | 1.41 | 1.51 | 1.61 | 1.66  | 1.63  |
|                                          | sarcosine (N-Methylglycine)          | 0.62        | 0.72 | 0.61 | 0.5  | 0.57  | 0.53  |
|                                          | threonine                            | 0.95        | 0.92 | 0.87 | 0.82 | 0.78  | 0.8   |
|                                          | N-acetylthreonine                    | 1.07        | 1.1  | 1.11 | 1.13 | 1.16  | 1.03  |
| Alanine and Aspartate Metabolism         | aspartate                            | 0.76        | 1    | 1.51 | 1.72 | 2.32  | 1.71  |
| Glutamate Metabolism                     | glutamate                            | 0.71        | 0.73 | 0.82 | 0.81 | 0.95  | 0.67  |
|                                          | glutamine                            | 1.05        | 1.1  | 1.09 | 1.1  | 1.19  | 1.06  |
| Histidine Metabolism                     | histidine                            | 0.98        | 0.94 | 0.95 | 0.94 | 0.95  | 0.91  |
|                                          | 1-methylhistidine                    | 1.2         | 1.2  | 1.17 | 1.28 | 1.34  | 1.28  |
|                                          | 3-methylhistidine                    | 1.14        | 1.12 | 1.13 | 1.12 | 1.31  | 1.15  |
|                                          | trans-urocanate                      | 0.99        | 0.81 | 1.06 | 1.85 | 1.25  | 1.14  |
|                                          | imidazole lactate                    | 1.15        | 1.2  | 1.33 | 1.33 | 1.37  | 1.18  |
|                                          | N-acetylhistamine                    | 0.57        | 0.75 | 0.76 | 0.74 | 0.47  | 0.48  |
| Lysine Metabolism                        | lysine                               | 1.04        | 1.04 | 1.06 | 1.1  | 1.07  | 1.04  |
|                                          | N6-acetyllysine                      | 1.01        | 1.08 | 1.15 | 1.19 | 1.15  | 1.17  |
|                                          | N-6-trimethyllysine                  | 1.16        | 1.21 | 1.19 | 1.25 | 1.22  | 1.24  |
|                                          | 2-aminoadipate                       | 0.89        | 0.92 | 1.06 | 1.19 | 1.15  | 1.12  |
|                                          | glutarate (pentanedioate)            | 0.75        | 0.64 | 0.67 | 0.61 | 0.63  | 0.71  |
|                                          | glutaryl carnitine (C5)              | 1.19        | 1.32 | 1.43 | 1.46 | 1.53  | 1.47  |
|                                          | 3-methylglutaryl carnitine (1)       | 1.41        | 1.43 | 1.68 | 1.95 | 2.2   | 1.74  |
|                                          | N-acetyl-cadaverine                  | 1.14        | 1.21 | 1.01 | 0.98 | 0.94  | 0.82  |
| Phenylalanine and Tyrosine Metabolism    | phenylalanine                        | 1.01        | 0.99 | 1    | 0.94 | 0.89  | 0.92  |
|                                          | N-acetylphenylalanine                | 0.87        | 0.81 | 0.81 | 0.8  | 0.77  | 0.8   |
|                                          | phenylpyruvate                       | 0.92        | 1.02 | 0.98 | 1.08 | 0.8   | 1.09  |
|                                          | phenyllactate (PLA)                  | 0.7         | 0.68 | 0.72 | 0.74 | 0.74  | 0.69  |
|                                          | 4-hydroxyphenylacetate               | 0.55        | 0.84 | 0.89 | 0.72 | 0.41  | 0.21  |
|                                          | phenylacetylglutamine                | 0.76        | 1.12 | 0.8  | 0.93 | 0.72  | 0.55  |
|                                          | tyrosine                             | 1           | 0.95 | 1    | 0.95 | 0.88  | 0.87  |
|                                          | tyramine                             | 0.54        | 0.95 | 0.7  | 0.87 | 0.47  | 0.43  |
|                                          | 3-(4-hydroxyphenyl)lactate           | 1.09        | 1.09 | 1.15 | 1.16 | 1.17  | 1.09  |
|                                          | phenol sulfate                       | 1.06        | 0.93 | 1.46 | 1.51 | 1.22  | 1.27  |
|                                          | o-cresol sulfate                     | 0.68        | 0.49 | 0.26 | 0.27 | 0.36  | 0.47  |
|                                          | 3-methoxytyrosine                    | 1           | 0.94 | 1.13 | 1.09 | 1.16  | 1.3   |
|                                          | Gentisate                            | 0.79        | 0.85 | 0.58 | 0.72 | 0.45  | 0.59  |
|                                          | 3-[3-(sulfooxy)phenyl]propanoic acid | 0.79        | 0.86 | 0.47 | 0.56 | 0.47  | 0.47  |

Table S2 (cont.)

|                                                  |                                     |      |      |      |      |      |      |
|--------------------------------------------------|-------------------------------------|------|------|------|------|------|------|
|                                                  | 3-(3-hydroxyphenyl)propionate       | 0.68 | 0.75 | 0.45 | 0.52 | 0.45 | 0.48 |
|                                                  | 3-(4-hydroxyphenyl)propionate       | 0.45 | 0.57 | 0.37 | 0.32 | 0.31 | 0.28 |
|                                                  | 4-hydroxyphenylacetyl glycine       | 0.67 | 0.79 | 0.79 | 0.63 | 0.76 | 0.71 |
|                                                  | 2-hydroxyphenylacetate              | 0.78 | 0.93 | 0.86 | 0.8  | 1    | 0.82 |
|                                                  | 4-hydroxycinnamate sulfate          | 0.66 | 0.69 | 0.43 | 0.38 | 0.31 | 0.28 |
| Tryptophan Metabolism                            | tryptophan                          | 1.06 | 1.03 | 1.1  | 1.03 | 0.99 | 1.02 |
|                                                  | N-acetyltryptophan                  | 0.85 | 0.78 | 0.76 | 0.65 | 0.68 | 0.7  |
|                                                  | indolelactate                       | 0.87 | 0.87 | 0.91 | 0.89 | 0.87 | 0.83 |
|                                                  | indoleacetate                       | 0.9  | 0.85 | 0.93 | 0.86 | 0.73 | 0.59 |
|                                                  | indolepropionate                    | 0.71 | 0.66 | 0.64 | 0.59 | 0.61 | 0.56 |
|                                                  | 3-indoxyl sulfate                   | 0.92 | 0.87 | 0.7  | 0.98 | 0.75 | 0.71 |
|                                                  | kynurenine                          | 1.04 | 1.05 | 1.16 | 1.18 | 1.19 | 1.19 |
|                                                  | kynurenate                          | 1.03 | 1.04 | 1.1  | 1.08 | 1.21 | 1.12 |
|                                                  | picolinate                          | 0.95 | 0.89 | 0.72 | 0.58 | 0.58 | 0.48 |
|                                                  | 5-hydroxyindoleacetate              | 0.87 | 0.84 | 0.81 | 0.77 | 0.94 | 0.95 |
|                                                  | tryptophan betaine                  | 1.03 | 1.02 | 1.14 | 1.29 | 1.77 | 2.25 |
|                                                  | indole-3-carboxylic acid            | 0.82 | 0.79 | 0.78 | 0.53 | 0.49 | 0.49 |
|                                                  | C-glycosyltryptophan                | 0.94 | 0.86 | 0.96 | 0.96 | 1.01 | 0.91 |
| Leucine, Isoleucine and Valine Metabolism        | leucine                             | 1.02 | 1    | 0.98 | 0.93 | 0.89 | 0.95 |
|                                                  | N-acetylleucine                     | 0.89 | 0.83 | 0.82 | 0.81 | 0.75 | 0.85 |
|                                                  | isovalerate                         | 1.02 | 1.01 | 0.97 | 0.91 | 0.8  | 0.67 |
|                                                  | isovaleryl glycine                  | 1.21 | 1.08 | 1.18 | 1.28 | 1.41 | 1.38 |
|                                                  | isovalerylcarnitine                 | 0.79 | 0.71 | 0.9  | 0.77 | 0.86 | 0.77 |
|                                                  | alpha-hydroxyisovaleroyl carnitine* | 0.86 | 0.84 | 0.73 | 0.76 | 0.64 | 0.63 |
|                                                  | alpha-hydroxyisovalerate            | 0.96 | 0.9  | 0.96 | 1.02 | 1.11 | 1.04 |
|                                                  | methylsuccinate                     | 1.28 | 1.15 | 1.04 | 1.13 | 1.08 | 0.95 |
|                                                  | allo-isoleucine                     | 0.97 | 1.26 | 1.22 | 1.55 | 1.42 | 1.18 |
|                                                  | 3-methyl-2-oxovalerate              | 1.1  | 1.04 | 1.11 | 1.14 | 1.1  | 1.16 |
|                                                  | 2-hydroxy-3-methylvalerate          | 0.57 | 0.55 | 0.6  | 0.65 | 0.7  | 0.66 |
|                                                  | 3-hydroxy-2-ethylpropionate         | 1.32 | 1.19 | 1.3  | 1.63 | 1.53 | 1.48 |
|                                                  | ethylmalonate                       | 1.14 | 1.09 | 1.06 | 0.98 | 0.93 | 0.79 |
|                                                  | isobutyryl glycine                  | 1.24 | 1.06 | 0.84 | 1.24 | 1.25 | 1.51 |
|                                                  | alpha-hydroxyisocaproate            | 0.94 | 0.99 | 1.01 | 1.06 | 1.19 | 1.18 |
|                                                  | 6-hydroxynorleucine                 | 1.1  | 1.14 | 1.18 | 1.24 | 1.25 | 1.15 |
| Methionine, Cysteine, SAM and Taurine Metabolism | methionine                          | 0.91 | 0.88 | 0.85 | 0.76 | 0.71 | 0.79 |
|                                                  | N-acetylmethionine                  | 0.85 | 0.83 | 0.79 | 0.83 | 0.8  | 0.8  |
|                                                  | N-formylmethionine                  | 1.04 | 1.06 | 1.07 | 1.1  | 1.11 | 1.1  |
|                                                  | methionine sulfoxide                | 0.73 | 0.74 | 0.71 | 0.6  | 0.6  | 0.69 |
|                                                  | S-adenosylhomocysteine (SAH)        | 0.63 | 0.56 | 0.63 | 0.72 | 0.46 | 0.5  |
|                                                  | Cystathionine                       | 0.8  | 0.8  | 0.79 | 0.68 | 0.76 | 0.76 |
|                                                  | 2-aminobutyrate                     | 1.23 | 1.2  | 1.29 | 1.5  | 1.41 | 1.28 |
|                                                  | S-methylcysteine                    | 1.05 | 1.14 | 1.1  | 1.08 | 1.18 | 1.17 |
|                                                  | hypotaurine                         | 0.31 | 0.31 | 0.35 | 0.41 | 0.36 | 0.28 |

Table S2 (cont.)

|                                                      |                                |      |      |      |      |      |      |
|------------------------------------------------------|--------------------------------|------|------|------|------|------|------|
|                                                      | taurine                        | 0.72 | 0.72 | 0.72 | 0.72 | 0.68 | 0.62 |
|                                                      | N-acetyltaurine                | 0.86 | 0.86 | 0.82 | 0.81 | 0.84 | 0.74 |
| Urea cycle;<br>Arginine and<br>Proline<br>Metabolism | urea                           | 1.05 | 0.95 | 0.93 | 0.83 | 0.83 | 0.79 |
|                                                      | proline                        | 0.91 | 0.93 | 0.95 | 0.92 | 0.91 | 0.97 |
|                                                      | citrulline                     | 0.96 | 0.94 | 0.98 | 0.91 | 0.87 | 0.85 |
|                                                      | homocitrulline                 | 1.15 | 1.11 | 1.11 | 1.12 | 1.07 | 0.98 |
|                                                      | dimethylarginine (SDMA + ADMA) | 1.14 | 1.18 | 1.25 | 1.3  | 1.39 | 1.13 |
|                                                      | N-delta-acetylornithine        | 0.94 | 0.89 | 0.86 | 0.81 | 0.77 | 0.74 |
|                                                      | N-methylproline                | 0.86 | 0.88 | 0.8  | 0.8  | 0.74 | 0.8  |
|                                                      | trans-4-hydroxyproline         | 0.91 | 1.03 | 0.97 | 0.86 | 1.01 | 1.09 |
|                                                      | pro-hydroxy-pro                | 1.16 | 1.47 | 1.63 | 1.55 | 1.5  | 1.92 |
| Creatine<br>Metabolism                               | creatine                       | 0.68 | 0.66 | 0.8  | 0.84 | 0.85 | 0.71 |
|                                                      | creatinine                     | 1.1  | 1.1  | 1.13 | 1.18 | 1.19 | 1.17 |
|                                                      | creatine phosphate             | 0.46 | 0.55 | 0.68 | 0.72 | 0.75 | 0.64 |
|                                                      | guanidinoacetate               | 0.94 | 1.07 | 1.29 | 1.35 | 1.34 | 1.24 |
| Glutathione<br>Metabolism                            | 5-methylthioadenosine (MTA)    | 0.66 | 0.6  | 0.82 | 0.8  | 0.67 | 0.58 |
|                                                      | N-acetylputrescine             | 0.97 | 1.02 | 1.06 | 0.98 | 0.94 | 0.9  |
|                                                      | cysteine-glutathione disulfide | 0.88 | 0.91 | 1    | 1.11 | 1.07 | 0.99 |
|                                                      | ophthalmate                    | 0.99 | 1.2  | 2.02 | 3.68 | 3.09 | 2.64 |
| Felinine<br>Metabolism                               | felinine                       | 1.07 | 1    | 1.04 | 1.06 | 1.11 | 1.08 |
|                                                      | N-acetylfelinine*              | 1.16 | 1.08 | 1.03 | 1.04 | 0.98 | 0.98 |
| <i>Peptides</i>                                      |                                |      |      |      |      |      |      |
| Gamma-<br>glutamyl<br>Amino Acid                     | gamma-glutamylalanine          | 1.07 | 1.03 | 1.24 | 1.36 | 1.37 | 1.28 |
|                                                      | gamma-glutamylglutamate        | 0.73 | 0.78 | 0.95 | 1.03 | 0.98 | 0.88 |
|                                                      | gamma-glutamylglutamine        | 1.12 | 1.12 | 1.16 | 1.25 | 1.2  | 1.18 |
|                                                      | gamma-glutamylisoleucine*      | 1.23 | 1.22 | 1.23 | 1.35 | 1.22 | 1.25 |
|                                                      | gamma-glutamylleucine          | 1.16 | 1.14 | 1.17 | 1.19 | 1.14 | 1.15 |
|                                                      | gamma-glutamylmethionine       | 1.02 | 0.99 | 0.98 | 0.92 | 0.88 | 0.87 |
|                                                      | gamma-glutamylvaline           | 1.2  | 1.12 | 1.15 | 1.24 | 1.19 | 1.14 |
|                                                      | gamma-glutamyl-2-aminobutyrate | 1.41 | 1.56 | 1.77 | 2.11 | 1.99 | 1.91 |
| Dipeptide<br>Derivative                              | carnosine                      | 1.03 | 0.99 | 0.95 | 0.93 | 0.95 | 0.85 |
|                                                      | N-acetylcarnosine              | 1.24 | 1.33 | 1.37 | 1.37 | 1.27 | 1.36 |
|                                                      | anserine                       | 1.08 | 1.09 | 1.11 | 1.16 | 1.22 | 1.17 |
| Dipeptide                                            | glycylleucine                  | 0.73 | 0.73 | 0.81 | 0.73 | 0.52 | 0.79 |
|                                                      | prolylglycine                  | 1.27 | 1.35 | 1.34 | 1.49 | 1.38 | 1.33 |
|                                                      | valylglycine                   | 0.8  | 1.18 | 0.96 | 0.86 | 0.85 | 0.67 |

<sup>a</sup>For each metabolite, mean value is the group mean of re-scaled data to have median equal to 1.

<sup>b</sup>Mean values in green were decreased, whereas in red were increased with *P*- and *q*- values < 0.05. *P* values were calculated from one way Anova; *q*- values were used to estimate the false discovery rate (FDR) in multiple comparisons.

**Table S3.** Serum metabolites related to carbohydrate and energy metabolism that were altered in cats undergoing weight loss<sup>a,b</sup>

| Metabolic Pathway                          | Metabolite          | Fold change <sup>a, b</sup> |      |      |      |       |       |
|--------------------------------------------|---------------------|-----------------------------|------|------|------|-------|-------|
|                                            |                     | wk 1                        | wk 2 | wk 4 | wk 8 | wk 12 | wk 16 |
|                                            |                     | wk 0                        | wk 0 | wk 0 | wk 0 | wk 0  | wk 0  |
| Carbohydrates                              |                     |                             |      |      |      |       |       |
| Glycolysis, GNG, and Pyruvate Metabolism   | lactate             | 0.68                        | 0.68 | 0.68 | 0.8  | 0.84  | 0.74  |
|                                            | glycerate           | 0.88                        | 0.81 | 0.85 | 0.85 | 0.84  | 0.84  |
| Pentose Metabolism                         | ribose              | 0.68                        | 0.52 | 0.48 | 0.59 | 0.73  | 0.59  |
|                                            | arabitol            | 0.98                        | 0.96 | 0.8  | 0.81 | 0.92  | 0.8   |
| Fructose, Mannose and Galactose Metabolism | fructose            | 1.15                        | 1.22 | 1.18 | 1.21 | 1.29  | 1.25  |
|                                            | mannose             | 1.27                        | 1.23 | 1.19 | 1.21 | 1.18  | 1.11  |
| Aminosugar Metabolism                      | glucuronate         | 1.03                        | 0.98 | 0.93 | 0.9  | 0.91  | 0.85  |
|                                            | N-acetylneuraminate | 0.74                        | 0.72 | 0.61 | 0.62 | 0.56  | 0.54  |
|                                            | erythronate*        | 1.12                        | 1.11 | 1.08 | 1.07 | 1.14  | 1.07  |
| Energy                                     |                     |                             |      |      |      |       |       |
| TCA Cycle                                  | citrate             | 1.09                        | 1.07 | 0.99 | 0.98 | 1.05  | 1.09  |
|                                            | alpha-ketoglutarate | 0.83                        | 0.81 | 0.85 | 0.94 | 0.92  | 0.95  |
|                                            | succinylcarnitine   | 1.18                        | 1.23 | 1.33 | 1.51 | 1.65  | 1.53  |
|                                            | succinate           | 0.81                        | 0.83 | 0.84 | 0.91 | 0.91  | 0.83  |
|                                            | fumarate            | 0.56                        | 0.54 | 0.59 | 0.75 | 0.7   | 0.69  |
|                                            | tricarballylate     | 1.04                        | 0.91 | 1.6  | 0.7  | 0.54  | 0.48  |
| Oxidative Phosphorylation                  | phosphate           | 0.93                        | 0.93 | 0.91 | 0.92 | 0.9   | 0.88  |

<sup>a</sup>For each metabolite, mean value is the group mean of re-scaled data to have median equal to 1.

<sup>b</sup>Mean values in green were decreased, whereas in red were increased with *P*- and *q*- values < 0.05. *P* values were calculated from one way Anova; *q*- values were used to estimate the false discovery rate (FDR) in multiple comparisons.



**Table S4.** Serum metabolites related to nucleotide, xenobiotic, and cofactor and vitamin metabolism that were altered in cats undergoing weight loss<sup>a,b</sup>

| Metabolic Pathway                                     | Metabolite                         | Fold change |             |             |             |              |              |
|-------------------------------------------------------|------------------------------------|-------------|-------------|-------------|-------------|--------------|--------------|
|                                                       |                                    | <u>wk 1</u> | <u>wk 2</u> | <u>wk 4</u> | <u>wk 8</u> | <u>wk 12</u> | <u>wk 16</u> |
|                                                       |                                    | wk 0         | wk 0         |
| Nucleotide                                            |                                    |             |             |             |             |              |              |
| Purine Metabolism, (Hypo)Xanthine/ Inosine containing | inosine                            | 1.02        | 0.96        | 1.01        | 0.97        | 0.97         | 0.89         |
|                                                       | hypoxanthine                       | 0.81        | 0.74        | 0.72        | 0.78        | 0.8          | 0.7          |
|                                                       | xanthine                           | 0.48        | 0.44        | 0.51        | 0.66        | 0.63         | 0.7          |
|                                                       | 2'-deoxyinosine                    | 0.46        | 0.51        | 0.45        | 0.55        | 0.74         | 0.63         |
|                                                       | urate                              | 0.74        | 0.7         | 0.77        | 0.84        | 0.74         | 0.84         |
|                                                       | allantoic acid                     | 1.21        | 1.25        | 1.26        | 0.81        | 1.26         | 1.05         |
| Purine Metabolism, Adenine containing                 | N6-methyladenosine                 | 1.1         | 1.33        | 1.6         | 1.66        | 1.62         | 1.63         |
|                                                       | N6-carbamoylthreonyladenosine      | 1.02        | 1.12        | 1.27        | 1.36        | 1.3          | 1.22         |
| Purine Metabolism, Guanine containing                 | guanosine                          | 0.98        | 0.83        | 0.78        | 0.9         | 0.91         | 0.76         |
|                                                       | guanine                            | 0.68        | 0.58        | 0.49        | 0.65        | 0.62         | 0.61         |
|                                                       | 7-methylguanine                    | 1.08        | 1.06        | 1.07        | 1.06        | 1.11         | 1.12         |
| Pyrimidine Metabolism, Orotate containing             | orotate                            | 1.1         | 1.08        | 1.17        | 1.26        | 1.38         | 1.2          |
|                                                       | orotidine                          | 0.96        | 1.15        | 1.29        | 1.46        | 1.5          | 1.11         |
| Pyrimidine Metabolism, Uracil containing              | uridine                            | 0.82        | 0.69        | 0.68        | 0.77        | 0.7          | 0.61         |
|                                                       | uracil                             | 0.53        | 0.46        | 0.6         | 0.65        | 0.69         | 0.62         |
|                                                       | pseudouridine                      | 1.08        | 1.07        | 1.06        | 1.05        | 1.09         | 1.03         |
|                                                       | 2'-deoxyuridine                    | 0.63        | 0.6         | 0.68        | 0.86        | 0.79         | 0.75         |
|                                                       | 3-ureidopropionate                 | 1.08        | 1.11        | 1.2         | 1.21        | 1.25         | 1.12         |
|                                                       | N-acetyl-beta-alanine              | 0.88        | 0.91        | 0.85        | 0.91        | 0.93         | 0.87         |
| Pyrimidine Metabolism, Cytidine containing            | cytidine 5'-monophosphate (5'-CMP) | 0.63        | 0.72        | 0.39        | 0.66        | 0.52         | 0.4          |
|                                                       | cytidine                           | 0.89        | 0.86        | 0.8         | 0.79        | 0.67         | 0.68         |
|                                                       | 5-methylcytidine                   | 0.91        | 0.9         | 0.84        | 0.76        | 1            | 1.16         |
|                                                       | N4-acetylcytidine                  | 1.13        | 1.11        | 1.27        | 1.31        | 1.21         | 1.22         |
|                                                       | 2'-deoxycytidine                   | 1.02        | 1.02        | 1.06        | 1.05        | 1.11         | 1.12         |
|                                                       | 5-methyl-2'-deoxycytidine          | 0.95        | 0.98        | 0.99        | 0.84        | 0.93         | 1.02         |
| Pyrimidine Metabolism, Thymine containing             | 3-aminoisobutyrate                 | 1.11        | 1.25        | 1.13        | 1.29        | 1.19         | 1.18         |
| Xenobiotics                                           |                                    |             |             |             |             |              |              |
| Benzoate Metabolism                                   | 2-hydroxyhippurate (salicylurate)  | 0.89        | 0.93        | 0.88        | 0.73        | 0.64         | 0.62         |
|                                                       | 3-hydroxyhippurate                 | 0.95        | 0.85        | 0.52        | 0.5         | 0.49         | 0.43         |
|                                                       | 4-hydroxyhippurate                 | 0.87        | 0.87        | 0.58        | 0.58        | 0.58         | 0.5          |
|                                                       | mandelate                          | 1.08        | 0.99        | 0.86        | 0.76        | 1.3          | 1.27         |

Table S4 (cont.)

|                                        |                                       |      |      |      |      |      |      |
|----------------------------------------|---------------------------------------|------|------|------|------|------|------|
|                                        | 3-methyl catechol sulfate (1)         | 0.8  | 0.94 | 0.68 | 0.61 | 0.92 | 1.04 |
|                                        | 4-methylcatechol sulfate              | 0.95 | 1.13 | 0.63 | 1    | 0.64 | 0.82 |
|                                        | 4-ethylphenylsulfate                  | 0.41 | 0.46 | 0.24 | 0.34 | 0.26 | 0.22 |
|                                        | 4-vinylphenol sulfate                 | 0.49 | 0.36 | 0.31 | 0.24 | 0.19 | 0.19 |
|                                        | 3-(2-hydroxyphenyl)propionate         | 0.82 | 0.75 | 0.63 | 0.58 | 0.46 | 0.66 |
|                                        | 3-methoxycatechol sulfate (2)         | 0.45 | 0.67 | 0.38 | 0.55 | 0.46 | 0.46 |
| Food Component/<br>Plant               | methyl-4-hydroxybenzoate sulfate      | 0.35 | 0.22 | 0.14 | 0.18 | 0.24 | 0.49 |
|                                        | 2-piperidinone                        | 0.83 | 0.81 | 0.74 | 0.81 | 0.85 | 0.76 |
|                                        | gluconate                             | 0.64 | 0.63 | 0.76 | 0.71 | 0.37 | 0.34 |
|                                        | cinnamoylglycine                      | 1.58 | 1.73 | 1.09 | 2.27 | 1.32 | 2    |
|                                        | equol sulfate                         | 0.67 | 0.84 | 0.47 | 0.41 | 0.17 | 0.07 |
|                                        | ergothioneine                         | 0.85 | 0.8  | 0.79 | 0.74 | 0.64 | 0.57 |
|                                        | ferulic acid 4-sulfate                | 0.37 | 0.65 | 0.35 | 0.08 | 0.14 | 0.23 |
|                                        | indoleacrylate                        | 0.81 | 0.85 | 0.84 | 0.7  | 0.72 | 0.73 |
|                                        | thymol sulfate                        | 0.72 | 0.57 | 0.41 | 0.22 | 0.14 | 0.1  |
|                                        | 4-allylphenol sulfate                 | 1.05 | 1.06 | 1.14 | 1.28 | 1.32 | 1.44 |
|                                        | methyl glucopyranoside (alpha + beta) | 0.93 | 0.92 | 0.8  | 0.63 | 0.55 | 0.39 |
|                                        | 4-vinylguaiacol sulfate               | 1.8  | 1.34 | 1.2  | 1    | 1    | 0.81 |
|                                        | pyrraline                             | 0.82 | 0.83 | 0.72 | 0.6  | 0.72 | 0.78 |
|                                        | eugenol sulfate                       | 0.82 | 0.94 | 0.92 | 0.83 | 0.65 | 0.51 |
| Drug                                   | 4-acetylphenol sulfate                | 0.4  | 0.44 | 0.44 | 0.26 | 0.89 | 0.29 |
|                                        | 6-oxopiperidine-2-carboxylic acid     | 1.13 | 1.11 | 1.04 | 1.04 | 1.16 | 1    |
|                                        | hydroquinone sulfate                  | 0.7  | 0.78 | 0.46 | 0.47 | 0.44 | 0.51 |
|                                        | salicylate                            | 0.73 | 0.71 | 0.65 | 0.5  | 0.34 | 0.31 |
| Chemical                               | 1,2-propanediol                       | 0.83 | 0.67 | 0.83 | 0.76 | 0.78 | 0.78 |
|                                        | 2-pyrrolidinone                       | 0.97 | 0.89 | 0.94 | 0.92 | 1.01 | 1.64 |
|                                        | O-sulfo-L-tyrosine                    | 0.84 | 0.8  | 0.76 | 0.77 | 0.8  | 0.69 |
|                                        | ethyl glucuronide                     | 0.17 | 0.24 | 0.31 | 0.28 | 0.91 | 1.36 |
|                                        | 2-aminophenol sulfate                 | 0.83 | 0.91 | 0.67 | 0.63 | 0.54 | 0.6  |
|                                        | 2-ethylhexanoate                      | 1.05 | 1.05 | 1.1  | 1.1  | 1.04 | 1.09 |
|                                        | 2-hydroxyisobutyrate                  | 1.18 | 1.27 | 1.34 | 1.63 | 1.9  | 1.87 |
|                                        | dimethyl sulfone                      | 1.4  | 1.31 | 1.29 | 1.2  | 0.94 | 0.94 |
|                                        | ectoine                               | 1.05 | 1.03 | 1.14 | 1.22 | 1.23 | 1.12 |
|                                        | 3-hydroxypyridine sulfate             | 0.69 | 0.74 | 0.54 | 0.45 | 0.65 | 0.78 |
| <i>Vitamins and Cofactors</i>          |                                       |      |      |      |      |      |      |
| Nicotinate and Nicotinamide Metabolism | nicotinamide                          | 0.43 | 0.44 | 0.61 | 0.62 | 0.57 | 0.55 |
|                                        | 1-methylnicotinamide                  | 0.83 | 0.7  | 0.7  | 0.58 | 0.7  | 0.37 |
|                                        | trigonelline (N'-methylnicotinate)    | 0.99 | 0.92 | 0.93 | 0.83 | 0.81 | 0.9  |
|                                        | N1-Methyl-2-pyridone-5-carboxamide    | 1.06 | 0.99 | 0.95 | 0.89 | 0.83 | 0.59 |
| Riboflavin Metabolism                  | riboflavin (Vitamin B2)               | 0.95 | 0.81 | 0.75 | 0.69 | 0.61 | 0.77 |

**Table S4 (cont.)**

|                                     |                         |             |             |             |             |             |             |
|-------------------------------------|-------------------------|-------------|-------------|-------------|-------------|-------------|-------------|
| Pantothenate and CoA Metabolism     | pantothenate            | 0.98        | 0.94        | 0.95        | 0.96        | 0.92        | <b>0.86</b> |
| Ascorbate and Aldarate Metabolism   | threonate               | 0.98        | 0.99        | 0.98        | 0.96        | 0.97        | <b>0.91</b> |
|                                     | oxalate (ethanedioate)  | 0.92        | 0.9         | 0.97        | <b>0.89</b> | 0.92        | <b>0.88</b> |
|                                     | gulonic acid*           | 1.14        | 1.07        | 1.01        | 0.92        | 0.95        | <b>0.88</b> |
| Tocopherol Metabolism               | alpha-tocopherol        | 0.94        | 0.97        | 0.92        | <b>0.89</b> | 0.91        | 0.94        |
|                                     | delta-tocopherol        | 0.68        | 0.69        | <b>0.59</b> | 0.71        | <b>0.55</b> | <b>0.63</b> |
|                                     | gamma-tocopherol        | 0.82        | 0.89        | <b>0.76</b> | <b>0.64</b> | <b>0.55</b> | <b>0.56</b> |
|                                     | alpha-CEHC sulfate      | 1.07        | 1.06        | 1.09        | <b>1.44</b> | <b>1.44</b> | <b>1.53</b> |
| Hemoglobin and Porphyrin Metabolism | bilirubin (Z,Z)         | 1.04        | 0.74        | 0.87        | <b>0.58</b> | 0.87        | 0.71        |
|                                     | bilirubin (E,E)*        | 2.06        | 1.58        | 1.18        | 0.85        | 1.63        | <b>1.91</b> |
|                                     | biliverdin              | 1.12        | 0.86        | 0.94        | <b>0.42</b> | 0.83        | 0.66        |
| Vitamin B6 Metabolism               | pyridoxine (Vitamin B6) | <b>0.72</b> | <b>0.74</b> | <b>0.69</b> | <b>0.74</b> | <b>0.54</b> | <b>0.46</b> |
|                                     | pyridoxal               | 1.39        | 1.42        | <b>1.55</b> | 1.39        | 1.12        | <b>1.42</b> |
|                                     | pyridoxate              | 1.19        | <b>1.21</b> | 1.16        | 1.06        | 1.01        | 0.96        |

<sup>a</sup>For each metabolite, mean value is the group mean of re-scaled data to have median equal to 1.

<sup>b</sup>Mean values in green were decreased, whereas in red were increased with *P*- and *q*- values < 0.05. *P* values were calculated from one way Anova; *q*- values were used to estimate the false discovery rate (FDR) in multiple comparisons.

**Table S5.** Correlation coefficients (r) between fasted serum chemistry measures and metabolites<sup>a</sup>

| Metabolite                                    | Cr                      | BUN          | TP    | GLC   | CHOL  | TG          | ALB   | GLOB        | ALP          | ALT   |
|-----------------------------------------------|-------------------------|--------------|-------|-------|-------|-------------|-------|-------------|--------------|-------|
|                                               | <b>Lipid Metabolism</b> |              |       |       |       |             |       |             |              |       |
| 12-hete                                       | 0.25                    | 0.49         | -0.02 | 0.16  | 0.02  | -0.08       | 0.06  | -0.04       | -0.36        | -0.09 |
| Thromboxane B2                                | 0.42                    | 0.50         | 0.06  | 0.34  | -0.08 | -0.16       | 0.12  | 0.02        | -0.38        | -0.07 |
| N-oleoyltaurine                               | -0.28                   | 0.01         | -0.15 | 0.07  | -0.15 | 0.11        | 0.38  | -0.31       | -0.28        | -0.11 |
| N-stearoyltaurine                             | <b>-0.66</b>            | -0.42        | 0.31  | -0.31 | 0.17  | <b>0.58</b> | 0.17  | 0.27        | 0.15         | -0.10 |
| Butyrylcarnitine                              | <b>-0.71</b>            | -0.36        | 0.07  | -0.31 | -0.07 | <b>0.52</b> | 0.18  | 0.01        | 0.20         | 0.00  |
| Methylmalonate (MMA)                          | <b>0.63</b>             | <b>0.60</b>  | 0.12  | 0.47  | -0.14 | -0.31       | 0.17  | 0.06        | -0.31        | -0.13 |
| Hydroxybutyrylcarnitine                       | -0.22                   | <b>-0.58</b> | 0.44  | -0.34 | 0.25  | 0.22        | 0.07  | 0.45        | 0.49         | -0.10 |
| 2-aminoheptanoate                             | -0.28                   | <b>-0.54</b> | 0.07  | 0.02  | 0.12  | 0.13        | 0.39  | -0.08       | 0.02         | -0.18 |
| 3-carboxy-4-methyl-5-propyl-2-furanpropanoate | 0.29                    | <b>0.75</b>  | 0.27  | 0.12  | -0.11 | 0.09        | 0.09  | 0.26        | -0.33        | 0.13  |
| Eicosanodioate                                | -0.25                   | -0.49        | 0.06  | 0.17  | -0.29 | 0.24        | 0.43  | -0.10       | 0.08         | 0.14  |
| Hexadecanedioate                              | <b>-0.59</b>            | -0.22        | 0.13  | -0.02 | -0.09 | <b>0.51</b> | 0.31  | 0.02        | -0.14        | 0.05  |
| Octadecanedioate                              | -0.41                   | -0.45        | 0.11  | 0.11  | -0.18 | 0.39        | 0.33  | -0.01       | 0.00         | 0.14  |
| Tetradecanedioate                             | -0.50                   | -0.13        | 0.17  | -0.01 | 0.17  | 0.42        | 0.25  | 0.08        | -0.28        | -0.05 |
| 12,13-dihome                                  | <b>-0.58</b>            | 0.23         | 0.10  | -0.22 | -0.19 | <b>0.55</b> | 0.18  | 0.03        | -0.17        | 0.16  |
| 13-hode + 9-hode                              | <b>-0.59</b>            | 0.16         | 0.18  | -0.40 | -0.16 | <b>0.68</b> | 0.03  | 0.18        | -0.07        | 0.20  |
| 16-hydroxypalmitate                           | <b>-0.71</b>            | -0.26        | 0.17  | -0.46 | -0.30 | <b>0.68</b> | 0.02  | 0.18        | 0.47         | 0.18  |
| 2-hydroxydecanoate                            | <b>-0.73</b>            | -0.14        | 0.35  | -0.43 | 0.05  | <b>0.75</b> | 0.09  | 0.34        | 0.18         | 0.13  |
| 2-hydroxyoctanoate                            | <b>-0.70</b>            | -0.06        | 0.37  | -0.39 | 0.03  | <b>0.73</b> | 0.18  | 0.33        | 0.14         | 0.11  |
| 3-hydroxydecanoate                            | <b>-0.59</b>            | -0.27        | 0.22  | -0.45 | -0.02 | <b>0.62</b> | 0.12  | 0.19        | 0.27         | -0.03 |
| 3-hydroxylaurate                              | <b>-0.71</b>            | -0.20        | 0.20  | -0.42 | -0.06 | <b>0.76</b> | 0.06  | 0.20        | 0.11         | 0.09  |
| 3-hydroxymyristate                            | -0.49                   | -0.17        | 0.26  | -0.31 | 0.23  | <b>0.54</b> | 0.04  | 0.27        | -0.11        | 0.05  |
| Glycerol                                      | <b>-0.54</b>            | <b>-0.58</b> | -0.02 | -0.20 | -0.35 | 0.48        | 0.09  | -0.06       | 0.47         | 0.24  |
| Scyllo-inositol                               | 0.03                    | 0.02         | 0.44  | 0.24  | 0.19  | 0.26        | 0.28  | 0.37        | -0.13        | 0.02  |
| 3-hydroxybutyrate (BHBA)                      | -0.23                   | -0.47        | 0.48  | -0.39 | 0.35  | 0.24        | 0.03  | <b>0.51</b> | 0.35         | -0.13 |
| 10-heptadecenoate (17:1n7)                    | <b>-0.53</b>            | -0.11        | -0.05 | -0.29 | -0.37 | 0.42        | 0.07  | -0.09       | 0.06         | 0.15  |
| 10-nonadecenoate (19:1n9)                     | -0.39                   | -0.15        | -0.23 | -0.16 | -0.37 | 0.18        | 0.08  | -0.28       | 0.04         | 0.08  |
| Arachidate (20:0)                             | -0.33                   | 0.16         | -0.18 | -0.24 | -0.13 | 0.16        | -0.07 | -0.17       | -0.20        | 0.09  |
| Cis-vaccenate (18:1n7)                        | -0.34                   | -0.02        | -0.13 | -0.12 | -0.33 | 0.18        | 0.17  | -0.21       | -0.10        | -0.08 |
| Eicosenoate (20:1n9 or 11)                    | -0.37                   | -0.10        | -0.17 | -0.30 | -0.25 | 0.18        | 0.00  | -0.18       | 0.02         | 0.07  |
| Erucate (22:1n9)                              | -0.15                   | 0.22         | -0.28 | -0.23 | 0.03  | -0.06       | -0.17 | -0.24       | -0.13        | -0.16 |
| Margarate (17:0)                              | -0.17                   | 0.25         | -0.14 | -0.08 | -0.23 | 0.11        | 0.03  | -0.16       | -0.30        | 0.13  |
| Myristate (14:0)                              | <b>-0.70</b>            | <b>-0.51</b> | 0.13  | -0.44 | -0.22 | <b>0.60</b> | -0.02 | 0.15        | 0.47         | 0.13  |
| Myristoleate (14:1n5)                         | <b>-0.66</b>            | -0.45        | 0.16  | -0.40 | -0.29 | <b>0.64</b> | 0.05  | 0.15        | 0.45         | 0.20  |
| Oleate (18:1n9)                               | -0.22                   | 0.04         | -0.03 | -0.18 | -0.33 | 0.20        | 0.12  | -0.09       | -0.10        | 0.14  |
| Palmitoleate (16:1n7)                         | <b>-0.58</b>            | -0.26        | 0.10  | -0.40 | -0.37 | <b>0.55</b> | 0.05  | 0.09        | 0.29         | 0.22  |
| 1-linoleoylglycerophosphoethanolamine         | 0.14                    | 0.39         | -0.08 | 0.20  | 0.02  | -0.09       | 0.08  | -0.12       | <b>-0.52</b> | 0.05  |

**Table S5 (cont.)**

|                                             |                     |                     |       |       |                     |                    |       |                     |                     |       |
|---------------------------------------------|---------------------|---------------------|-------|-------|---------------------|--------------------|-------|---------------------|---------------------|-------|
| 1-linoleoylglycerophosphoinositol           | -0.14               | 0.18                | -0.46 | 0.05  | 0.17                | -0.21              | 0.05  | <b><u>-0.51</u></b> | <b><u>-0.56</u></b> | -0.21 |
| 1-oleoylglycerophosphoethanolamine          | 0.04                | 0.33                | -0.26 | 0.20  | -0.01               | -0.12              | 0.18  | -0.35               | <b><u>-0.57</u></b> | -0.03 |
| 1-palmitoylplasmenylethanolamine            | 0.25                | 0.46                | -0.02 | 0.17  | -0.01               | -0.10              | 0.02  | -0.03               | -0.33               | -0.02 |
| 2-palmitoleoylglycerophosphocholine         | <b><u>-0.54</u></b> | 0.03                | -0.14 | -0.20 | -0.06               | 0.33               | 0.14  | -0.20               | -0.22               | 0.07  |
| Oleoyl-linoleoyl-glycerophosphoinositol     | 0.05                | <b><u>0.63</u></b>  | -0.17 | 0.01  | 0.20                | -0.10              | 0.05  | -0.21               | <b><u>-0.56</u></b> | -0.13 |
| Palmitoyl-linoleoyl-glycerophosphocholine   | 0.03                | -0.12               | -0.07 | 0.01  | <b><u>0.59</u></b>  | -0.21              | -0.08 | -0.05               | -0.17               | -0.38 |
| Palmitoyl-linoleoyl-glycerophosphoinositol  | -0.02               | <b><u>0.54</u></b>  | -0.16 | -0.02 | 0.22                | -0.06              | 0.02  | -0.19               | -0.50               | -0.14 |
| Stearoyl-arachidonoyl-glycerophosphocholine | -0.41               | -0.18               | 0.36  | -0.37 | 0.32                | 0.40               | -0.01 | 0.39                | 0.25                | -0.19 |
| Stearoyl-linoleoyl-glycerophosphocholine    | 0.09                | 0.44                | 0.24  | -0.09 | 0.46                | 0.08               | -0.17 | 0.33                | -0.28               | -0.06 |
| Stearoyl-linoleoyl-glycerophosphocholine    | 0.22                | 0.47                | 0.08  | 0.18  | 0.18                | -0.12              | -0.15 | 0.14                | -0.27               | -0.08 |
| 10-undecenoate (11:1n1)                     | 0.20                | -0.33               | -0.15 | 0.31  | -0.32               | -0.24              | 0.50  | -0.36               | -0.01               | -0.03 |
| 5-dodecenoate (12:1n7)                      | <b><u>-0.67</u></b> | -0.39               | 0.03  | -0.29 | -0.23               | <b><u>0.56</u></b> | 0.14  | -0.02               | 0.26                | 0.07  |
| Caprate (10:0)                              | <b><u>-0.65</u></b> | -0.29               | 0.18  | -0.17 | -0.13               | <b><u>0.59</u></b> | 0.25  | 0.10                | 0.11                | 0.08  |
| Laurate (12:0)                              | <b><u>-0.72</u></b> | -0.37               | 0.13  | -0.38 | -0.26               | <b><u>0.66</u></b> | 0.10  | 0.10                | 0.31                | 0.14  |
| Mevalonate                                  | -0.36               | 0.22                | -0.18 | -0.36 | 0.17                | 0.07               | -0.30 | -0.08               | -0.26               | 0.04  |
| 1-arachidonylglycerol                       | -0.36               | <b><u>-0.54</u></b> | -0.24 | -0.26 | -0.25               | 0.11               | 0.05  | -0.28               | 0.43                | 0.04  |
| 1-docosahexaenoylglycerol                   | -0.38               | -0.46               | -0.18 | -0.30 | -0.26               | 0.23               | -0.03 | -0.18               | 0.48                | 0.14  |
| 1-linoleoylglycerol (1-monolinolein)        | -0.31               | -0.45               | -0.37 | -0.23 | -0.15               | 0.02               | 0.01  | -0.40               | 0.24                | -0.05 |
| 1-oleoylglycerol (1-monoolein)              | -0.39               | -0.39               | -0.35 | -0.18 | -0.29               | 0.15               | 0.17  | -0.45               | 0.22                | 0.04  |
| 1-palmitoylglycerol (1-monopalmitin)        | -0.29               | <b><u>-0.61</u></b> | -0.30 | -0.22 | -0.25               | 0.01               | 0.08  | -0.36               | 0.41                | 0.01  |
| 2-docosahexaenoylglycerol                   | -0.40               | -0.31               | -0.29 | -0.24 | -0.18               | 0.10               | -0.08 | -0.29               | 0.35                | 0.08  |
| 2-linoleoylglycerol (2-monolinolein)        | -0.30               | -0.37               | -0.40 | -0.04 | -0.24               | -0.03              | 0.08  | -0.47               | 0.25                | -0.03 |
| 2-oleoylglycerol (2-monoolein)              | -0.35               | -0.22               | -0.23 | -0.08 | -0.24               | 0.23               | 0.23  | -0.34               | 0.07                | 0.08  |
| Glycerophosphoethanolamine                  | -0.09               | 0.17                | 0.01  | 0.05  | 0.23                | 0.07               | 0.11  | -0.04               | -0.41               | -0.12 |
| Adrenate (22:4n6)                           | <b><u>-0.56</u></b> | -0.20               | 0.02  | -0.30 | -0.24               | 0.43               | 0.10  | -0.02               | 0.22                | 0.13  |
| Dihomo-linoleate (20:2n6)                   | -0.46               | -0.06               | -0.14 | -0.36 | -0.31               | 0.32               | -0.01 | -0.15               | 0.12                | 0.16  |
| Dihomo-linolenate (20:3n3 or n6)            | <b><u>-0.63</u></b> | 0.17                | -0.21 | -0.31 | -0.28               | 0.46               | 0.07  | -0.26               | -0.02               | 0.09  |
| Docosahexaenoate (DHA; 22:6n3)              | <b><u>-0.73</u></b> | -0.42               | -0.10 | -0.41 | -0.05               | 0.38               | 0.12  | -0.16               | 0.26                | -0.03 |
| Docosapentaenoate (n3 DPA; 22:5n3)          | <b><u>-0.54</u></b> | -0.22               | -0.17 | -0.40 | -0.13               | 0.26               | 0.01  | -0.19               | 0.17                | 0.04  |
| Docosapentaenoate (n6 DPA; 22:5n6)          | <b><u>-0.64</u></b> | -0.48               | -0.19 | -0.41 | -0.17               | 0.27               | 0.07  | -0.23               | 0.45                | -0.02 |
| Stearidonate (18:4n3)                       | <b><u>-0.64</u></b> | -0.11               | -0.05 | -0.22 | -0.25               | 0.48               | 0.20  | -0.13               | -0.07               | 0.13  |
| Taurolithocholate 3-sulfate                 | -0.39               | -0.16               | -0.33 | -0.35 | -0.01               | 0.04               | 0.05  | -0.38               | 0.15                | -0.04 |
| Arachidoyl sphingomyelin                    | 0.03                | -0.16               | 0.01  | 0.15  | <b><u>-0.53</u></b> | 0.14               | 0.09  | -0.03               | 0.40                | 0.32  |
| Myristoyl sphingomyelin                     | <b><u>-0.53</u></b> | <b><u>-0.66</u></b> | 0.00  | -0.04 | 0.12                | 0.20               | 0.14  | -0.06               | 0.15                | -0.15 |
| Palmitoleoyl sphingomyelin                  | -0.12               | -0.37               | 0.08  | -0.19 | <b><u>0.54</u></b>  | -0.11              | -0.09 | 0.12                | 0.09                | -0.22 |
| Beta-sitosterol                             | 0.23                | 0.27                | -0.43 | 0.18  | 0.30                | -0.37              | -0.19 | -0.39               | <b><u>-0.53</u></b> | -0.06 |
| Campesterol                                 | 0.01                | 0.16                | -0.05 | 0.15  | 0.50                | -0.09              | 0.06  | -0.08               | <b><u>-0.57</u></b> | -0.25 |
| Cholestanol                                 | -0.30               | -0.16               | 0.24  | -0.18 | <b><u>0.73</u></b>  | 0.26               | 0.05  | 0.24                | -0.25               | -0.07 |
| Cholesterol                                 | -0.20               | -0.17               | 0.31  | -0.15 | <b><u>0.85</u></b>  | 0.12               | -0.05 | 0.36                | -0.12               | -0.42 |

Table S5 (cont.)

|                                      | Amino Acid Metabolism |                     |                    |                     |                     |                     |                     |                    |                    |       |
|--------------------------------------|-----------------------|---------------------|--------------------|---------------------|---------------------|---------------------|---------------------|--------------------|--------------------|-------|
| N-acetylaspartate (NAA)              | <b><u>0.61</u></b>    | 0.40                | 0.10               | 0.19                | -0.17               | -0.26               | 0.18                | 0.04               | -0.20              | 0.15  |
| Creatine                             | -0.06                 | -0.20               | 0.47               | 0.19                | 0.41                | 0.20                | -0.04               | <b><u>0.53</u></b> | -0.17              | 0.00  |
| Creatine phosphate                   | 0.29                  | 0.17                | 0.40               | <b><u>0.63</u></b>  | 0.11                | 0.06                | 0.21                | 0.36               | -0.30              | 0.03  |
| Creatinine                           | <b><u>0.95</u></b>    | 0.38                | 0.09               | <b><u>0.52</u></b>  | -0.16               | <b><u>-0.54</u></b> | 0.11                | 0.05               | -0.22              | 0.00  |
| Felinine                             | 0.10                  | 0.00                | 0.33               | 0.29                | <b><u>-0.51</u></b> | 0.24                | 0.24                | 0.27               | 0.15               | 0.27  |
| Gamma-glutamylfelinylglycine*        | 0.23                  | 0.30                | 0.29               | 0.38                | <b><u>-0.52</u></b> | 0.25                | 0.31                | 0.19               | -0.16              | 0.37  |
| N-acetylfelinine*                    | <b><u>0.57</u></b>    | <b><u>0.62</u></b>  | 0.13               | 0.47                | <b><u>-0.56</u></b> | -0.05               | 0.41                | -0.01              | -0.37              | 0.32  |
| Ophthalmate                          | 0.19                  | <b><u>-0.61</u></b> | 0.09               | 0.12                | -0.21               | -0.15               | 0.15                | 0.03               | <b><u>0.57</u></b> | 0.09  |
| Betaine                              | <b><u>0.54</u></b>    | 0.38                | 0.17               | 0.31                | -0.29               | -0.15               | 0.20                | 0.11               | -0.08              | -0.02 |
| Serine                               | <b><u>-0.64</u></b>   | <b><u>-0.52</u></b> | 0.09               | <b><u>-0.53</u></b> | -0.08               | 0.44                | -0.17               | 0.16               | <b><u>0.72</u></b> | 0.06  |
| 3-hydroxy-2-ethylpropionate          | -0.24                 | <b><u>-0.63</u></b> | 0.06               | -0.20               | -0.17               | 0.20                | 0.03                | 0.05               | 0.50               | 0.23  |
| 3-hydroxyisobutyrate                 | <b><u>-0.52</u></b>   | -0.42               | -0.25              | -0.31               | 0.08                | 0.12                | -0.29               | -0.16              | 0.33               | -0.11 |
| 3-methyl-2-oxobutyrate               | -0.27                 | -0.42               | -0.08              | -0.14               | -0.02               | 0.13                | 0.00                | -0.09              | 0.37               | 0.14  |
| 6-hydroxynorleucine                  | -0.22                 | -0.47               | 0.05               | 0.06                | -0.34               | 0.19                | 0.44                | -0.12              | 0.27               | -0.03 |
| Allo-isoleucine                      | -0.22                 | -0.39               | -0.03              | -0.27               | -0.02               | 0.09                | -0.03               | -0.02              | <b><u>0.53</u></b> | -0.14 |
| Alpha-hydroxyisocaproate             | -0.10                 | <b><u>-0.64</u></b> | -0.02              | 0.00                | 0.29                | -0.10               | -0.12               | 0.02               | 0.32               | -0.09 |
| Beta-hydroxyisovalerate              | 0.17                  | <b><u>0.51</u></b>  | -0.01              | -0.02               | -0.45               | -0.01               | 0.05                | -0.03              | 0.08               | 0.21  |
| Ethylmalonate                        | -0.36                 | 0.11                | 0.06               | -0.19               | -0.23               | 0.33                | 0.46                | -0.12              | 0.08               | -0.05 |
| Isobutyrylcarnitine                  | -0.43                 | <b><u>-0.52</u></b> | 0.35               | -0.37               | -0.06               | <b><u>0.51</u></b>  | 0.02                | 0.38               | <b><u>0.67</u></b> | 0.11  |
| Isovalerylcarnitine                  | <b><u>-0.64</u></b>   | -0.43               | -0.03              | -0.17               | -0.11               | 0.43                | 0.09                | -0.07              | 0.32               | 0.04  |
| N-acetylisoleucine                   | 0.31                  | 0.25                | 0.22               | <b><u>0.51</u></b>  | -0.45               | 0.11                | <b><u>0.62</u></b>  | -0.01              | -0.21              | 0.19  |
| Valine                               | -0.40                 | -0.08               | -0.04              | -0.25               | -0.25               | 0.42                | 0.14                | -0.09              | 0.35               | 0.18  |
| 2-aminoadipate                       | <b><u>0.57</u></b>    | 0.10                | 0.39               | 0.19                | 0.23                | -0.25               | -0.06               | 0.45               | 0.14               | -0.03 |
| 3-methylglutaryl carnitine (1)       | -0.18                 | <b><u>-0.55</u></b> | 0.04               | -0.26               | -0.39               | 0.20                | 0.05                | 0.03               | <b><u>0.77</u></b> | 0.26  |
| Glutaryl carnitine (C5)              | 0.05                  | -0.42               | 0.01               | -0.01               | -0.26               | -0.01               | 0.27                | -0.10              | 0.50               | 0.10  |
| Lysine                               | 0.16                  | 0.16                | 0.17               | -0.09               | -0.39               | 0.17                | -0.07               | 0.21               | <b><u>0.51</u></b> | 0.33  |
| N6-acetyllysine                      | <b><u>0.60</u></b>    | 0.35                | -0.07              | 0.17                | 0.05                | -0.43               | -0.23               | 0.02               | 0.10               | -0.08 |
| N-6-trimethyllysine                  | <b><u>0.67</u></b>    | 0.38                | 0.04               | 0.48                | -0.38               | -0.35               | 0.22                | -0.04              | -0.04              | -0.03 |
| Pipecolate                           | 0.32                  | <b><u>0.56</u></b>  | 0.09               | 0.14                | -0.23               | -0.07               | 0.13                | 0.04               | 0.03               | -0.07 |
| 2-aminobutyrate                      | -0.22                 | <b><u>-0.54</u></b> | -0.17              | -0.19               | -0.20               | 0.01                | -0.17               | -0.12              | <b><u>0.60</u></b> | 0.13  |
| Cystathionine                        | 0.04                  | 0.16                | 0.31               | 0.07                | 0.26                | 0.08                | 0.20                | 0.26               | -0.43              | -0.06 |
| Hypotaurine                          | -0.06                 | 0.17                | <b><u>0.59</u></b> | 0.21                | 0.18                | 0.46                | 0.25                | <b><u>0.54</u></b> | -0.24              | 0.09  |
| N-acetyltaurine                      | 0.18                  | 0.42                | 0.04               | 0.01                | 0.30                | -0.15               | -0.06               | 0.07               | -0.26              | -0.22 |
| N-formylmethionine                   | 0.45                  | 0.05                | -0.47              | 0.15                | -0.05               | <b><u>-0.57</u></b> | -0.11               | -0.47              | -0.07              | 0.03  |
| Taurine                              | -0.03                 | 0.31                | 0.06               | -0.04               | 0.30                | 0.01                | -0.07               | 0.09               | -0.21              | -0.24 |
| 3-(3-hydroxyphenyl)propionate        | -0.09                 | 0.41                | 0.40               | 0.01                | -0.01               | 0.40                | 0.23                | 0.35               | -0.17              | 0.06  |
| 3-(4-hydroxyphenyl)lactate           | 0.05                  | -0.19               | -0.44              | -0.14               | 0.10                | -0.30               | <b><u>-0.56</u></b> | -0.26              | 0.32               | 0.09  |
| 3-[3-(sulfooxy)phenyl]propanoic acid | -0.03                 | 0.47                | 0.33               | 0.04                | -0.06               | 0.34                | 0.26                | 0.26               | -0.33              | 0.09  |

**Table S5 (cont.)**

|                                |                     |                     |                     |                    |                     |                     |                     |                     |                     |       |
|--------------------------------|---------------------|---------------------|---------------------|--------------------|---------------------|---------------------|---------------------|---------------------|---------------------|-------|
| 3-methoxytyrosine              | -0.40               | <b><u>-0.58</u></b> | 0.19                | -0.08              | -0.12               | 0.37                | 0.15                | 0.15                | 0.35                | -0.04 |
| 4-hydroxycinnamate sulfate     | 0.24                | <b><u>0.65</u></b>  | 0.01                | 0.13               | -0.10               | -0.11               | 0.05                | -0.01               | -0.47               | 0.06  |
| 4-hydroxyphenylacetyl glycine  | -0.35               | -0.30               | 0.15                | -0.39              | <b><u>0.67</u></b>  | 0.12                | -0.09               | 0.19                | -0.01               | -0.32 |
| 4-hydroxyphenylpyruvate        | -0.04               | -0.11               | -0.21               | -0.22              | 0.42                | -0.21               | <b><u>-0.57</u></b> | -0.01               | 0.30                | -0.06 |
| Dopamine sulfate (2)           | 0.22                | 0.34                | -0.23               | 0.33               | -0.24               | -0.23               | 0.44                | -0.42               | <b><u>-0.51</u></b> | -0.03 |
| Gentisate                      | 0.10                | <b><u>0.59</u></b>  | 0.33                | 0.22               | -0.36               | 0.29                | 0.31                | 0.24                | -0.18               | 0.27  |
| P-cresol sulfate               | 0.16                | 0.38                | 0.22                | 0.00               | <b><u>-0.51</u></b> | 0.14                | 0.23                | 0.15                | 0.24                | 0.21  |
| Phenyllactate (PLA)            | -0.05               | 0.01                | -0.20               | -0.26              | 0.43                | -0.13               | <b><u>-0.55</u></b> | 0.00                | 0.03                | 0.07  |
| Tyrosine                       | <b><u>-0.50</u></b> | 0.08                | -0.23               | -0.26              | -0.16               | 0.39                | 0.04                | -0.27               | 0.08                | 0.10  |
| N-acetylputrescine             | 0.04                | 0.17                | 0.29                | 0.15               | 0.19                | 0.09                | 0.47                | 0.14                | -0.39               | -0.23 |
| 3-indoxyl sulfate              | 0.31                | <b><u>0.60</u></b>  | 0.14                | 0.10               | -0.16               | -0.14               | 0.10                | 0.11                | -0.12               | 0.14  |
| Anthranilate                   | 0.21                | <b><u>0.53</u></b>  | 0.23                | 0.02               | -0.25               | 0.06                | 0.05                | 0.23                | -0.12               | 0.14  |
| Indole-3-carboxylic acid       | 0.37                | <b><u>0.59</u></b>  | 0.19                | 0.08               | -0.26               | -0.03               | 0.11                | 0.16                | -0.22               | 0.21  |
| Indoleacetate                  | <b><u>0.53</u></b>  | <b><u>0.67</u></b>  | 0.21                | 0.25               | -0.25               | -0.14               | 0.15                | 0.17                | -0.31               | 0.18  |
| Indolelactate                  | 0.05                | 0.08                | -0.45               | -0.18              | 0.22                | -0.29               | <b><u>-0.55</u></b> | -0.28               | 0.07                | 0.08  |
| Indolepropionate               | 0.31                | <b><u>0.57</u></b>  | 0.23                | -0.01              | -0.26               | 0.03                | 0.08                | 0.22                | -0.15               | 0.25  |
| Kynurenine                     | -0.26               | <b><u>-0.53</u></b> | 0.13                | -0.22              | -0.01               | 0.17                | -0.18               | 0.21                | <b><u>0.71</u></b>  | 0.01  |
| N-acetylkynurenine (2)         | 0.17                | 0.34                | -0.23               | 0.08               | 0.31                | -0.30               | 0.10                | -0.29               | -0.46               | -0.22 |
| N-acetyltryptophan             | 0.20                | <b><u>0.55</u></b>  | -0.13               | 0.10               | 0.14                | -0.15               | 0.12                | -0.18               | <b><u>-0.57</u></b> | 0.05  |
| Picolinate                     | 0.41                | <b><u>0.59</u></b>  | 0.15                | 0.11               | -0.26               | -0.07               | 0.08                | 0.13                | -0.26               | 0.20  |
| Serotonin (5HT)                | 0.24                | 0.07                | -0.42               | 0.29               | 0.04                | -0.39               | -0.04               | -0.44               | -0.39               | 0.04  |
| Tryptophan                     | <b><u>-0.54</u></b> | -0.46               | -0.10               | -0.35              | 0.36                | 0.24                | 0.14                | -0.16               | 0.13                | -0.17 |
| Homocitrulline                 | -0.20               | -0.04               | <b><u>-0.51</u></b> | 0.04               | <b><u>-0.63</u></b> | 0.04                | 0.03                | <b><u>-0.57</u></b> | 0.24                | 0.17  |
| Pro-hydroxy-pro                | <b><u>0.63</u></b>  | 0.09                | -0.07               | <b><u>0.53</u></b> | 0.07                | -0.44               | 0.11                | -0.11               | -0.20               | -0.22 |
| Urea                           | 0.26                | <b><u>0.75</u></b>  | 0.04                | 0.06               | -0.05               | -0.05               | 0.05                | 0.02                | -0.37               | 0.17  |
| <b>Peptide Metabolism</b>      |                     |                     |                     |                    |                     |                     |                     |                     |                     |       |
| Felinyglycine                  | 0.29                | 0.35                | -0.19               | 0.40               | <b><u>-0.70</u></b> | -0.05               | 0.24                | -0.30               | -0.14               | 0.29  |
| Prolyglycine                   | <b><u>0.75</u></b>  | 0.28                | -0.01               | 0.44               | 0.12                | <b><u>-0.55</u></b> | 0.10                | -0.05               | -0.33               | -0.09 |
| Valylglycine                   | 0.41                | <b><u>0.52</u></b>  | -0.16               | 0.09               | -0.05               | -0.28               | -0.02               | -0.16               | -0.21               | -0.10 |
| Anserine                       | <b><u>0.60</u></b>  | 0.00                | 0.34                | 0.37               | 0.15                | -0.28               | -0.02               | 0.38                | -0.05               | -0.01 |
| Gamma-glutamyl-2-aminobutyrate | -0.04               | <b><u>-0.65</u></b> | -0.07               | -0.16              | -0.14               | -0.10               | -0.08               | -0.05               | <b><u>0.78</u></b>  | 0.01  |
| Gamma-glutamylglutamate        | 0.23                | -0.04               | <b><u>0.54</u></b>  | 0.20               | 0.25                | 0.12                | 0.14                | <b><u>0.53</u></b>  | 0.14                | -0.08 |
| Gamma-glutamylthreonine        | -0.20               | 0.10                | -0.28               | -0.09              | -0.39               | 0.14                | 0.25                | -0.40               | 0.24                | -0.07 |
| Gamma-glutamyltryptophan       | <b><u>-0.52</u></b> | -0.47               | 0.15                | -0.41              | <b><u>0.53</u></b>  | 0.33                | -0.10               | 0.20                | 0.26                | -0.21 |
| <b>Carbohydrate Metabolism</b> |                     |                     |                     |                    |                     |                     |                     |                     |                     |       |
| Glucose                        | <b><u>0.52</u></b>  | 0.18                | 0.13                | <b><u>0.75</u></b> | -0.19               | -0.14               | 0.18                | 0.08                | -0.34               | 0.21  |
| Arabitol                       | 0.19                | <b><u>0.51</u></b>  | -0.10               | -0.05              | -0.11               | -0.11               | -0.02               | -0.10               | 0.02                | 0.06  |
| Ribitol                        | -0.12               | -0.32               | 0.14                | -0.30              | <b><u>0.79</u></b>  | -0.05               | -0.20               | 0.23                | 0.03                | -0.37 |
| Ribonate                       | 0.17                | -0.10               | -0.09               | -0.09              | <b><u>0.66</u></b>  | -0.29               | -0.36               | 0.05                | -0.16               | -0.16 |

Table S5 (cont.)

| Energy Metabolism                     |              |              |             |             |              |             |             |             |             |       |
|---------------------------------------|--------------|--------------|-------------|-------------|--------------|-------------|-------------|-------------|-------------|-------|
| Alpha-ketoglutarate                   | <u>0.51</u>  | 0.26         | 0.08        | <u>0.55</u> | 0.00         | -0.18       | 0.05        | 0.07        | -0.37       | 0.25  |
| Citrate                               | 0.14         | 0.23         | -0.34       | 0.05        | -0.47        | -0.03       | 0.15        | -0.43       | 0.06        | 0.17  |
| Succinate                             | 0.40         | 0.30         | 0.29        | 0.44        | 0.04         | 0.00        | 0.22        | 0.23        | -0.25       | 0.08  |
| Xenobiotic Metabolism                 |              |              |             |             |              |             |             |             |             |       |
| 2-hydroxyhippurate (salicylurate)     | 0.27         | <u>0.67</u>  | -0.15       | 0.15        | -0.36        | -0.14       | -0.03       | -0.15       | -0.26       | 0.25  |
| 3-hydroxyhippurate                    | <u>-0.61</u> | -0.23        | 0.01        | -0.23       | 0.31         | 0.33        | -0.04       | 0.03        | -0.10       | -0.12 |
| 3-methoxycatechol sulfate (2)         | 0.16         | <u>0.52</u>  | 0.28        | 0.07        | -0.20        | 0.14        | 0.12        | 0.25        | -0.22       | 0.14  |
| 3-methyl catechol sulfate (1)         | 0.42         | <u>0.54</u>  | 0.17        | 0.04        | -0.35        | -0.06       | 0.19        | 0.10        | -0.14       | 0.24  |
| 4-hydroxyhippurate                    | -0.28        | 0.05         | 0.47        | -0.28       | <u>0.52</u>  | 0.43        | 0.06        | 0.48        | -0.17       | -0.08 |
| 4-methylcatechol sulfate              | 0.18         | 0.48         | 0.20        | 0.11        | <u>-0.55</u> | 0.20        | 0.29        | 0.10        | -0.03       | 0.31  |
| 4-vinylphenol sulfate                 | -0.02        | <u>0.61</u>  | 0.11        | -0.02       | -0.09        | 0.17        | 0.06        | 0.10        | -0.39       | 0.17  |
| Catechol sulfate                      | 0.01         | 0.18         | 0.17        | -0.04       | <u>-0.54</u> | 0.25        | 0.17        | 0.11        | 0.21        | 0.40  |
| Hippurate                             | 0.12         | 0.35         | -0.02       | -0.01       | <u>-0.50</u> | 0.08        | 0.13        | -0.08       | 0.13        | 0.32  |
| 1,2,3-benzenetriol sulfate (2)        | -0.14        | 0.15         | 0.14        | -0.16       | <u>-0.50</u> | 0.34        | 0.04        | 0.14        | 0.32        | 0.27  |
| 2-aminophenol sulfate                 | 0.13         | <u>0.79</u>  | 0.15        | 0.06        | -0.18        | 0.12        | 0.19        | 0.09        | -0.35       | 0.12  |
| 2-hydroxyisobutyrate                  | 0.18         | <u>-0.52</u> | 0.09        | -0.01       | -0.33        | -0.06       | 0.02        | 0.09        | <u>0.63</u> | 0.24  |
| 3-hydroxypyridine sulfate             | 0.28         | <u>0.61</u>  | 0.19        | 0.03        | 0.01         | -0.02       | -0.03       | 0.22        | -0.33       | 0.07  |
| Dimethyl sulfone                      | 0.13         | 0.49         | 0.17        | 0.11        | <u>-0.55</u> | 0.20        | 0.29        | 0.07        | 0.01        | 0.24  |
| Ectoine                               | -0.15        | <u>-0.51</u> | 0.11        | -0.06       | 0.15         | 0.01        | 0.03        | 0.11        | 0.21        | -0.12 |
| N-methylpipercolate                   | 0.43         | <u>0.65</u>  | -0.03       | 0.19        | -0.44        | -0.13       | 0.09        | -0.07       | -0.21       | 0.32  |
| Sulfate*                              | -0.44        | -0.25        | 0.25        | -0.19       | -0.30        | <u>0.57</u> | <u>0.25</u> | <u>0.18</u> | 0.31        | 0.22  |
| Hydroquinone sulfate                  | -0.11        | <u>0.56</u>  | 0.25        | -0.16       | -0.02        | 0.33        | 0.11        | 0.22        | -0.23       | 0.12  |
| Salicylate                            | 0.33         | <u>0.64</u>  | 0.22        | 0.11        | -0.24        | -0.01       | 0.13        | 0.19        | -0.29       | 0.18  |
| 2,3-dihydroxyisovalerate              | -0.12        | -0.02        | -0.08       | 0.03        | -0.36        | 0.27        | 0.24        | -0.18       | 0.13        | 0.12  |
| 2-piperidinone                        | 0.03         | 0.12         | 0.17        | 0.01        | <u>0.51</u>  | -0.04       | -0.08       | 0.22        | -0.20       | -0.11 |
| 4-allylphenol sulfate                 | <u>0.52</u>  | 0.28         | -0.18       | 0.22        | -0.38        | -0.40       | -0.18       | -0.13       | 0.05        | 0.01  |
| 4-vinylguaiacol sulfate               | 0.29         | <u>0.50</u>  | -0.12       | 0.07        | -0.07        | -0.26       | -0.17       | -0.07       | -0.22       | 0.13  |
| Erythritol                            | -0.49        | -0.21        | 0.15        | -0.28       | -0.20        | <u>0.51</u> | <u>0.16</u> | <u>0.11</u> | 0.41        | 0.08  |
| Eugenol sulfate                       | <u>0.51</u>  | <u>0.73</u>  | 0.05        | 0.28        | -0.28        | -0.22       | 0.09        | 0.01        | -0.35       | 0.18  |
| Gluconate                             | 0.10         | 0.17         | -0.30       | -0.11       | 0.27         | -0.24       | -0.43       | -0.16       | -0.15       | 0.09  |
| Homostachydrine*                      | <u>0.65</u>  | 0.42         | 0.07        | 0.39        | -0.16        | -0.28       | 0.16        | 0.01        | -0.16       | -0.04 |
| Indoleacrylate                        | 0.33         | <u>0.57</u>  | 0.17        | -0.02       | -0.29        | 0.01        | 0.08        | 0.15        | -0.06       | 0.28  |
| Methyl glucopyranoside (alpha + beta) | -0.03        | <u>0.61</u>  | 0.03        | -0.11       | 0.15         | 0.06        | -0.03       | 0.05        | -0.42       | -0.07 |
| Pyrraline                             | 0.20         | <u>0.64</u>  | 0.20        | 0.06        | 0.14         | 0.00        | -0.06       | 0.24        | -0.47       | 0.04  |
| Stachydrine                           | <u>0.66</u>  | <u>0.52</u>  | <u>0.08</u> | <u>0.51</u> | 0.07         | -0.35       | 0.22        | 0.00        | -0.46       | -0.16 |
| Nucleotide Metabolism                 |              |              |             |             |              |             |             |             |             |       |
| Allantoic acid                        | 0.45         | <u>0.50</u>  | -0.15       | 0.19        | -0.24        | -0.30       | 0.11        | -0.21       | -0.18       | -0.08 |
| Allantoin                             | 0.28         | <u>0.60</u>  | 0.11        | 0.09        | 0.21         | -0.08       | 0.06        | 0.09        | -0.40       | -0.16 |



**Table S5 (cont.)**

|                                    |                     |                     |                     |                     |                    |                    |                    |                     |                     |       |
|------------------------------------|---------------------|---------------------|---------------------|---------------------|--------------------|--------------------|--------------------|---------------------|---------------------|-------|
| Adenosine                          | 0.29                | 0.25                | -0.19               | 0.04                | 0.11               | -0.17              | -0.19              | -0.13               | -0.21               | 0.21  |
| N6-methyladenosine                 | -0.14               | <b><u>-0.54</u></b> | -0.11               | -0.17               | 0.07               | -0.03              | -0.13              | -0.08               | <b><u>0.50</u></b>  | -0.29 |
| 7-methylguanine                    | <b><u>0.60</u></b>  | 0.31                | 0.08                | 0.23                | -0.22              | -0.34              | 0.14               | 0.03                | 0.03                | -0.02 |
| Guanine                            | <b><u>-0.51</u></b> | -0.08               | 0.00                | -0.38               | 0.00               | 0.44               | 0.07               | -0.03               | 0.25                | -0.07 |
| 5-methyl-2'-deoxycytidine          | 0.47                | 0.37                | -0.28               | 0.42                | -0.08              | -0.41              | 0.05               | -0.32               | <b><u>-0.54</u></b> | 0.14  |
| Orotate                            | -0.08               | -0.25               | -0.32               | -0.23               | -0.11              | -0.18              | -0.20              | -0.27               | <b><u>0.62</u></b>  | -0.15 |
| Thymine                            | -0.20               | -0.28               | <b><u>0.51</u></b>  | <b><u>-0.16</u></b> | <b><u>0.15</u></b> | <b><u>0.39</u></b> | <b><u>0.03</u></b> | <b><u>0.55</u></b>  | 0.26                | 0.10  |
| <b>Vitamins and Cofactors</b>      |                     |                     |                     |                     |                    |                    |                    |                     |                     |       |
| Alpha-tocopherol                   | 0.33                | 0.30                | 0.18                | 0.13                | <b><u>0.60</u></b> | -0.18              | -0.06              | 0.22                | -0.35               | -0.18 |
| Gulonic acid                       | 0.46                | <b><u>0.75</u></b>  | 0.10                | 0.13                | -0.27              | -0.05              | 0.25               | 0.01                | -0.30               | 0.11  |
| Oxalate (ethanedioate)             | <b><u>-0.61</u></b> | -0.32               | -0.30               | -0.39               | -0.22              | 0.25               | -0.08              | -0.29               | 0.35                | 0.20  |
| Pyridoxate                         | 0.49                | <b><u>0.72</u></b>  | 0.06                | 0.20                | 0.01               | -0.33              | 0.12               | 0.02                | -0.27               | -0.21 |
| Pyridoxine (Vitamin B6)            | <b><u>-0.60</u></b> | -0.10               | 0.06                | -0.36               | 0.34               | 0.38               | -0.20              | 0.14                | 0.00                | -0.11 |
| Threonate                          | <b><u>-0.56</u></b> | -0.33               | <b><u>-0.52</u></b> | -0.20               | -0.24              | 0.12               | 0.02               | <b><u>-0.57</u></b> | 0.17                | 0.02  |
| Trigonelline (N'-methylnicotinate) | -0.17               | 0.13                | -0.05               | 0.26                | 0.17               | 0.03               | 0.17               | -0.12               | <b><u>-0.52</u></b> | -0.10 |

<sup>a</sup>Bold correlation coefficients (r) with p<0.0001 and with strong correlation (r>0.5). Cr: creatinine; BUN: blood urea nitrogen; TP: total protein; GLC: glucose; CHOL: cholesterol; TG: triglycerides; ALB: albumin; GLOB: globulin; ALP: alkaline phosphatase; ALT: alanine aminotransferase.

**Table S6.** Correlation coefficients (r) between DEXA scan results and metabolites<sup>a</sup>

| Metabolite                                         | FtMass       | LnMass       | BW           | %Fat         |
|----------------------------------------------------|--------------|--------------|--------------|--------------|
| <b>Lipid Metabolism</b>                            |              |              |              |              |
| N-stearoyltaurine                                  | <b>0.84</b>  | -0.18        | <b>0.77</b>  | <b>0.87</b>  |
| butyrylcarnitine                                   | <b>0.74</b>  | -0.12        | <b>0.69</b>  | <b>0.79</b>  |
| hydroxybutyrylcarnitine*                           | 0.47         | -0.32        | 0.38         | <b>0.54</b>  |
| octanoylcarnitine                                  | <b>0.59</b>  | -0.23        | <b>0.52</b>  | <b>0.64</b>  |
| 2-aminooctanoate                                   | <b>0.63</b>  | -0.13        | <b>0.58</b>  | <b>0.65</b>  |
| 15-methylpalmitate (isobar with 2-methylpalmitate) | <b>0.71</b>  | 0.02         | <b>0.69</b>  | <b>0.71</b>  |
| 17-methylstearate                                  | 0.49         | -0.19        | 0.43         | <b>0.51</b>  |
| 13-HODE + 9-HODE                                   | <b>0.61</b>  | 0.22         | <b>0.64</b>  | <b>0.52</b>  |
| 16-hydroxypalmitate                                | <b>0.85</b>  | -0.03        | <b>0.81</b>  | <b>0.81</b>  |
| 2-hydroxydecanoate                                 | <b>0.91</b>  | 0.10         | <b>0.91</b>  | <b>0.86</b>  |
| 2-hydroxyoctanoate                                 | <b>0.83</b>  | 0.08         | <b>0.82</b>  | <b>0.81</b>  |
| 3-hydroxydecanoate                                 | <b>0.73</b>  | -0.01        | <b>0.70</b>  | <b>0.70</b>  |
| 3-hydroxylaurate                                   | <b>0.74</b>  | -0.03        | <b>0.71</b>  | <b>0.72</b>  |
| alpha-hydroxycaproate                              | 0.46         | -0.33        | 0.38         | <b>0.58</b>  |
| glycerol                                           | <b>0.65</b>  | -0.07        | <b>0.62</b>  | <b>0.66</b>  |
| 3-hydroxybutyrate (BHBA)                           | 0.50         | -0.22        | 0.44         | <b>0.54</b>  |
| acetoacetate                                       | 0.46         | -0.32        | 0.38         | <b>0.54</b>  |
| 10-heptadecenoate (17:1n7)                         | <b>0.57</b>  | -0.04        | <b>0.55</b>  | <b>0.56</b>  |
| myristate (14:0)                                   | <b>0.81</b>  | -0.18        | <b>0.75</b>  | <b>0.81</b>  |
| myristoleate (14:1n5)                              | <b>0.87</b>  | 0.00         | <b>0.84</b>  | <b>0.82</b>  |
| palmitoleate (16:1n7)                              | <b>0.66</b>  | -0.05        | <b>0.63</b>  | <b>0.63</b>  |
| stearoyl-arachidonoyl-glycerophosphocholine (2)*   | <b>0.60</b>  | -0.11        | <b>0.56</b>  | <b>0.61</b>  |
| stearoyl-linoleoyl-glycerophosphocholine (2)*      | -0.49        | 0.11         | -0.45        | <b>-0.51</b> |
| 5-dodecenoate (12:1n7)                             | <b>0.77</b>  | -0.11        | <b>0.72</b>  | <b>0.76</b>  |
| caprate (10:0)                                     | <b>0.68</b>  | -0.04        | <b>0.65</b>  | <b>0.65</b>  |
| laurate (12:0)                                     | <b>0.87</b>  | -0.05        | <b>0.84</b>  | <b>0.85</b>  |
| 1-arachidonoylglycerol                             | 0.49         | -0.17        | 0.44         | <b>0.51</b>  |
| 1-docosahexaenoylglycerol                          | <b>0.52</b>  | -0.07        | 0.49         | 0.50         |
| adrenate (22:4n6)                                  | <b>0.66</b>  | -0.01        | <b>0.64</b>  | <b>0.64</b>  |
| dihomo-linolenate (20:3n3 or n6)                   | <b>0.54</b>  | 0.11         | <b>0.55</b>  | <b>0.54</b>  |
| docosahexaenoate (DHA; 22:6n3)                     | <b>0.73</b>  | -0.18        | <b>0.67</b>  | <b>0.76</b>  |
| docosapentaenoate (n3 DPA; 22:5n3)                 | <b>0.60</b>  | -0.13        | <b>0.55</b>  | <b>0.63</b>  |
| docosapentaenoate (n6 DPA; 22:5n6)                 | <b>0.73</b>  | -0.15        | <b>0.67</b>  | <b>0.75</b>  |
| stearidonate (18:4n3)                              | <b>0.66</b>  | 0.06         | <b>0.65</b>  | <b>0.63</b>  |
| myristoyl sphingomyelin*                           | <b>0.56</b>  | -0.34        | 0.47         | <b>0.66</b>  |
| 5alpha-pregnan-3beta,20beta-diol monosulfate (1)   | -0.24        | <b>0.55</b>  | -0.12        | -0.32        |
| beta-sitosterol                                    | <b>-0.57</b> | 0.13         | <b>-0.52</b> | <b>-0.55</b> |
| <b>Amino Acid Metabolism</b>                       |              |              |              |              |
| N-acetylaspartate                                  | <b>-0.58</b> | 0.10         | <b>-0.54</b> | <b>-0.64</b> |
| Creatinine                                         | <b>-0.68</b> | 0.27         | <b>-0.60</b> | <b>-0.75</b> |
| Gamma-glutamylfelinylglycine                       | 0.06         | <b>0.58</b>  | 0.18         | -0.11        |
| N-acetylfelinine*                                  | -0.26        | <b>0.62</b>  | -0.13        | -0.45        |
| Glutathione, oxidized                              | 0.16         | 0.28         | 0.22         | 0.12         |
| Serine                                             | <b>0.69</b>  | -0.23        | <b>0.62</b>  | <b>0.73</b>  |
| Imidazole lactate                                  | 0.48         | -0.24        | 0.41         | <b>0.54</b>  |
| 2-methylbutyrylcarnitine                           | <b>0.59</b>  | -0.07        | <b>0.55</b>  | <b>0.61</b>  |
| 3-hydroxyisobutyrate                               | 0.17         | <b>-0.53</b> | 0.05         | 0.30         |
| 3-methylglutaconate                                | -0.47        | 0.38         | -0.38        | <b>-0.57</b> |
| Ethylmalonate                                      | <b>0.66</b>  | 0.00         | <b>0.64</b>  | <b>0.66</b>  |
| Isobutyrylcarnitine                                | <b>0.69</b>  | -0.16        | <b>0.64</b>  | <b>0.70</b>  |
| Isovalerylcarnitine                                | <b>0.67</b>  | -0.13        | <b>0.62</b>  | <b>0.70</b>  |
| N-acetylisoleucine                                 | -0.09        | <b>0.53</b>  | 0.02         | -0.23        |

**Table S6 (cont.)**

|                               |                     |                     |                     |                     |
|-------------------------------|---------------------|---------------------|---------------------|---------------------|
| 2-aminoadipate                | -0.50               | 0.07                | -0.47               | <b><u>-0.52</u></b> |
| 3-methylglutaryl carnitine    | <b><u>0.56</u></b>  | 0.02                | <b><u>0.54</u></b>  | <b><u>0.52</u></b>  |
| N6-acetyllysine               | <b><u>-0.64</u></b> | 0.05                | <b><u>-0.61</u></b> | <b><u>-0.66</u></b> |
| 3-methoxytyrosine             | 0.50                | -0.35               | 0.41                | <b><u>0.54</u></b>  |
| Indoleacetate                 | <b><u>-0.52</u></b> | 0.35                | -0.43               | <b><u>-0.60</u></b> |
| Picolinate                    | -0.46               | 0.26                | -0.39               | <b><u>-0.54</u></b> |
| Tryptophan                    | 0.49                | -0.23               | 0.43                | <b><u>0.56</u></b>  |
| Pro-hydroxy-pro               | <b><u>-0.58</u></b> | 0.11                | <b><u>-0.53</u></b> | <b><u>-0.60</u></b> |
| Proline                       | <b><u>-0.56</u></b> | 0.17                | <b><u>-0.51</u></b> | <b><u>-0.58</u></b> |
| Trans-4-hydroxyproline        | <b><u>-0.57</u></b> | 0.10                | <b><u>-0.53</u></b> | <b><u>-0.56</u></b> |
| <b>Peptide Metabolism</b>     |                     |                     |                     |                     |
| Prolylglycine                 | <b><u>-0.63</u></b> | 0.13                | <b><u>-0.58</u></b> | <b><u>-0.66</u></b> |
| Gamma-glutamyltryptophan      | <b><u>0.51</u></b>  | -0.36               | 0.42                | <b><u>0.60</u></b>  |
| <b>Energy Metabolism</b>      |                     |                     |                     |                     |
| Alpha-ketoglutarate           | -0.49               | <b><u>0.55</u></b>  | -0.35               | <b><u>-0.59</u></b> |
| <b>Xenobiotic Metabolism</b>  |                     |                     |                     |                     |
| 3-(2-hydroxyphenyl)propionate | 0.21                | 0.19                | <b><u>-0.61</u></b> | <b><u>0.61</u></b>  |
| 3-ethylphenylsulfate          | -0.10               | -0.07               | <b><u>0.70</u></b>  | <b><u>-0.70</u></b> |
| 4-ethylphenylsulfate          | 0.31                | 0.32                | 0.47                | -0.46               |
| 4-vinylphenol sulfate         | <b><u>-0.61</u></b> | <b><u>-0.62</u></b> | -0.09               | 0.09                |
| 1,2-propanediol               | <b><u>0.59</u></b>  | <b><u>0.58</u></b>  | -0.23               | 0.24                |
| 2-aminophenol sulfate         | <b><u>-0.73</u></b> | <b><u>-0.73</u></b> | 0.11                | -0.12               |
| 2-ethylhexanoate              | -0.10               | -0.12               | <b><u>-0.52</u></b> | <b><u>0.52</u></b>  |
| 4-hydroxychlorothalonil       | <b><u>0.52</u></b>  | <b><u>0.51</u></b>  | -0.40               | 0.40                |
| Dimethyl sulfone              | <b><u>-0.59</u></b> | <b><u>-0.58</u></b> | 0.42                | -0.42               |
| O-sulfo-L-tyrosine            | 0.11                | 0.13                | <b><u>0.61</u></b>  | <b><u>-0.61</u></b> |
| 2-piperidinone                | -0.01               | -0.03               | <b><u>-0.67</u></b> | <b><u>0.66</u></b>  |
| Cinnamoylglycine              | 0.19                | 0.21                | <b><u>0.50</u></b>  | <b><u>-0.50</u></b> |
| Ergothioneine                 | -0.01               | 0.00                | <b><u>0.57</u></b>  | <b><u>-0.56</u></b> |
| Erythritol                    | <b><u>0.56</u></b>  | <b><u>0.54</u></b>  | <b><u>-0.62</u></b> | <b><u>0.62</u></b>  |
| Eugenol sulfate               | 0.39                | 0.39                | -0.06               | 0.06                |
| Ferulic acid 4-sulfate        | 0.27                | 0.28                | -0.17               | 0.16                |
| Gluconate                     | <b><u>0.59</u></b>  | <b><u>0.56</u></b>  | <b><u>-0.72</u></b> | <b><u>0.73</u></b>  |
| Indolin-2-one                 | <b><u>0.59</u></b>  | <b><u>0.60</u></b>  | -0.01               | 0.01                |
| N-glycolylneuramate           | <b><u>0.52</u></b>  | <b><u>0.51</u></b>  | -0.41               | 0.42                |
| Pyrraline                     | <b><u>0.62</u></b>  | <b><u>0.58</u></b>  | <b><u>-0.79</u></b> | <b><u>0.80</u></b>  |
| Stachydrine                   | <b><u>0.58</u></b>  | <b><u>0.60</u></b>  | 0.32                | -0.32               |
| Vanillin                      | 0.05                | 0.10                | <b><u>0.63</u></b>  | <b><u>-0.64</u></b> |
| <b>Nucleotide Metabolism</b>  |                     |                     |                     |                     |
| 2'-deoxyinosine               | <b><u>0.55</u></b>  | -0.20               | 0.49                | <b><u>0.58</u></b>  |
| 7-methylguanine               | -0.44               | 0.02                | -0.43               | -0.50               |
| N2,N2-dimethylguanine         | -0.31               | -0.20               | -0.34               | -0.27               |
| 2'-deoxycytidine              | 0.21                | <b><u>-0.51</u></b> | 0.09                | 0.33                |
| 5-methyl-2'-deoxycytidine     | <b><u>-0.61</u></b> | 0.44                | -0.50               | <b><u>-0.70</u></b> |
| 5-methylcytidine              | -0.42               | -0.19               | -0.45               | -0.39               |
| N-acetyl-beta-alanine         | <b><u>0.51</u></b>  | -0.09               | 0.48                | <b><u>0.52</u></b>  |

<sup>a</sup> Bold correlation coefficients (r) with p<0.05 and with strong correlation (r>0.5). FtMass: total fat mass; LnMass: total lean mass; BW: body weight; % fat: % fat mass.
